# Supplementary material for: A new environmental-based tool to support forest breeders in selecting species adapted to current and near-term climate conditions
Source: Research Square preprint supplement (doi:10.21203/rs.3.rs-8693101/v1), 2026-02-09
Supplement: Supplementary file 2 [file 5d804c8d1385a3983719eff8.xlsx]

## Sheet: S1_list_of_species
id	species	n
1	Corymbia citriodora	4369
2	Corymbia henryi	1312
3	Corymbia maculata	15241
4	Corymbia torelliana	975
5	Eucalyptus amplifolia	3533
6	Eucalyptus badjensis	190
7	Eucalyptus benthamii	915
8	Eucalyptus brassiana	725
9	Eucalyptus camaldulensis	57113
10	Eucalyptus cladocalyx	4861
11	Eucalyptus deglupta	176
12	Eucalyptus diversicolor	458
13	Eucalyptus dorrigoensis	281
14	Eucalyptus drepanophylla	84
15	Eucalyptus dunnii	723
16	Eucalyptus globulus	12225
17	Eucalyptus gomphocephala	488
18	Eucalyptus grandis	4153
19	Eucalyptus grisea	68
20	Eucalyptus longirostrata	536
21	Eucalyptus macarthurii	1928
22	Eucalyptus major	402
23	Eucalyptus marginata	1751
24	Eucalyptus microcarpa	15684
25	Eucalyptus moluccana	10446
26	Eucalyptus nitens	986
27	Eucalyptus occidentalis	605
28	Eucalyptus pellita	339
29	Eucalyptus propinqua	5288
30	Eucalyptus punctata	12681
31	Eucalyptus raveretiana	334
32	Eucalyptus robusta	6343
33	Eucalyptus saligna	7270
34	Eucalyptus siderophloia	6738
35	Eucalyptus sideroxylon	4572
36	Eucalyptus smithii	2828
37	Eucalyptus tereticornis	22211
38	Eucalyptus thozetiana	538
39	Eucalyptus tricarpa	5915
40	Eucalyptus urophylla	118
41	Eucalyptus viminalis	33962
42	Eucalyptus wandoo	817
