# Supplementary material for: A new environmental-based tool to support forest breeders in selecting species adapted to current and near-term climate conditions
Source: Research Square preprint supplement (doi:10.21203/rs.3.rs-8693101/v1), 2026-02-09
Supplement: Supplementary file 3 [file 5f0c2a68a83118801ba94075.xlsx]

## Sheet: S2_species_envelope
id	species	bio1_min	bio1_p5	bio1_mean	bio1_p95	bio1_max	bio2_min	bio2_p5	bio2_mean	bio2_p95	bio2_max	bio3_min	bio3_p5	bio3_mean	bio3_p95	bio3_max	bio4_min	bio4_p5	bio4_mean	bio4_p95	bio4_max	bio5_min	bio5_p5	bio5_mean	bio5_p95	bio5_max	bio6_min	bio6_p5	bio6_mean	bio6_p95	bio6_max	bio7_min	bio7_p5	bio7_mean	bio7_p95	bio7_max	bio8_min	bio8_p5	bio8_mean	bio8_p95	bio8_max	bio9_min	bio9_p5	bio9_mean	bio9_p95	bio9_max	bio10_min	bio10_p5	bio10_mean
1	Corymbia citriodora	11.6	15.7	17.7	19.7	27.1	6.2	9	11	13.9	15.4	45.2	47.7	50.2	53.4	63.8	102.9	336.5	399.7	482.1	613.9	22	24.8	28.2	31.7	34.8	-0.9	4.1	6.3	8.1	22.3	9.7	18.2	21.9	27.1	31.1	7.8	18.3	21.3	24.5	27.9	6.5	11.9	13.5	16	26.4	15.9	19.9	22.4
2	Corymbia henryi	15.4	18	19.2	19.7	26.9	9	10.2	11.8	12.9	13.6	46.1	50.9	52.3	53.9	63.7	166.7	349.6	390.9	425.6	547.3	24.6	28	29.5	30.7	34	3.5	5.8	7	8.4	18	16	19.7	22.5	24.5	27.6	8.9	22.3	23.5	24.2	28	11.5	13.8	15	15.7	24.8	19.7	22.6	23.7
3	Corymbia maculata	11.1	15.7	18	21	25.3	5.6	9	11.2	14.5	15.4	40.1	47.8	50.6	53.9	60.7	222.2	327.6	402.3	497.7	653.8	22.5	24.9	28.6	32.5	37.7	0.5	4.1	6.4	9.2	17.5	14	18.1	22.2	27.9	32.3	5.9	17.1	21.7	25.6	28.7	8.5	11.9	14	18.3	24	16.4	19.9	22.8
4	Corymbia torelliana	13.7	15.7	17.6	19.5	23.6	8	9	11	13.9	15.3	45.3	47.8	50.1	53.3	57.5	238.4	336.5	401.2	485.1	634.5	24.6	24.8	28.2	31.6	36.1	0.7	4.1	6.2	8	15	15.5	18.2	22	27.2	31.5	7.6	18.3	21.3	24.1	27.7	8.8	11.9	13.5	15.8	21.6	18.8	19.9	22.4
5	Eucalyptus amplifolia	10.5	13.4	16.7	18.3	20.2	7.4	9.8	11.9	13.1	15.1	45.5	47.4	49.7	52.5	54	296.5	370.1	436.6	494.7	564	19.4	26.1	28.4	29.9	34.2	0	1	4.4	7.2	9.5	16.3	20.1	23.9	26.5	29.9	5.6	18	21.2	22.9	24.4	7.1	8.4	12.2	14.4	20.6	14.5	19.2	21.9
6	Eucalyptus badjensis	9.8	10.2	11.6	13.5	26.2	7.7	11.5	12	12.5	13.5	46.8	47.7	50.1	52.2	61.4	233.2	375.6	424.2	477.5	533	19.1	23.6	24.6	26.4	35.2	-2.6	-1.1	0.5	3.2	15.2	16.3	22.2	24	25.8	28.2	9	14.4	16	18.6	28	4.4	5.3	7.2	10.4	23.7	14.7	15.7	16.8
7	Eucalyptus benthamii	13.5	14.6	16.7	17.3	26.1	9.3	12.1	12.9	13.4	13.6	47.7	49.7	50.4	51.5	60.8	245.4	423.9	447.5	467.8	527.8	23.2	27.8	29.1	29.6	35.1	0.5	2.7	3.6	4	15	19.1	24.3	25.5	26.5	28.2	9.2	19.7	21.7	22.3	28	9.4	10.6	12.1	12.6	23.4	17.8	20	22.1
8	Eucalyptus brassiana	13.5	23.8	26	27	27.6	6.2	7.2	8.9	11.7	14.6	45.1	56.6	63.4	74	87.5	53.4	84.6	172.9	230.5	622.9	28.7	31.7	32.9	35	36.4	0.5	15.1	18.6	22.5	22.6	9.8	9.8	14.2	19	31	9.6	25.8	27.4	28.2	28.6	10.5	21.6	24.3	26.3	26.4	20	26.2	27.8
9	Eucalyptus camaldulensis	10.7	13.6	16.8	23.6	29.1	6.2	10.1	13	14.7	16.2	42.3	45.8	49.7	53.3	63.6	163.3	358.6	487	615.5	682	20.9	26.2	31.2	37	41.9	-1.1	3.1	4.9	9	19.3	13	20.3	26.3	31.1	34.4	4.7	8.6	14.2	28.7	33	7.6	12.7	19.4	23.1	29.4	15.4	18.7	22.8
10	Eucalyptus cladocalyx	11.6	13.1	14.7	16.8	23.5	6.2	6.6	10.6	13.5	15.6	42.6	44.9	49.2	51.7	57.6	262.4	285.7	396.9	501.8	623.7	21	23.5	26.8	31	35.9	0.5	3.5	5.3	9	9.8	13.5	14.5	21.4	26.9	31	6.5	9	11.7	16.4	28.4	7.2	16.6	18.8	21.8	24.8	15.6	18.3	19.6
11	Eucalyptus deglupta	17.4	17.4	23.8	27.7	28.1	5.9	7.2	8.4	10.4	10.8	50.3	56.3	76.7	86.4	87.5	22.6	28.6	80.5	276.7	370.2	22.5	23	29.5	33.6	34.2	8	11.1	18.3	23.3	24.1	7.5	9	11.3	18.4	20.8	16.7	16.7	23.9	28	28.5	15.3	17.7	23.4	28.1	28.2	17.8	18	24.7
12	Eucalyptus diversicolor	10.5	14.3	15.6	17	18.8	7.2	7.9	9.7	11.3	13.5	46.9	48.7	53.8	57.4	59.4	255.2	272.9	311.3	366.1	527.8	19.9	24.2	25.7	27.4	30.9	0.5	5.9	7.7	10	10.3	14.4	15.9	18.1	21.1	28.2	6.5	10.7	12.1	13.8	18.6	10.5	17.8	19.3	20.6	23.6	14.4	18.4	19.6
13	Eucalyptus dorrigoensis	13	13.8	15.3	16.4	22.4	9.7	10.9	11.9	12.8	13.2	49	49.5	50.8	52.5	57.2	255.2	374.8	426.4	460.5	466.1	24.4	25.4	26.6	28.1	30.2	0.9	1.4	3.3	5.2	13.3	16.9	21.3	23.4	25.2	25.5	18.1	18.7	20.1	21.4	24.8	7.2	8.1	10.5	12.2	19.6	18.3	18.9	20.3
14	Eucalyptus drepanophylla	15.6	19.9	23.4	24.7	24.9	9	9.5	10.7	14.5	15.3	45.5	50.1	53.5	55.8	58.1	259.5	278.1	343.4	531.3	655.2	26.9	29.5	32	34.2	38.9	4.7	5.7	12	14.3	15.1	16.4	17.4	20	28.6	33.7	16.8	23.5	26.8	27.9	29.9	13.9	15.3	19.9	21.4	22.9	20.3	23.9	27.1
15	Eucalyptus dunnii	13.5	16.3	17.5	19.6	20.5	9.1	10.8	11.5	12.8	13.4	47.5	50.8	52.3	53.3	54.4	323.9	363.8	387.2	433.1	466.3	23.2	26.7	27.8	29.3	30.9	1.6	3.8	5.8	8	10	18.2	20.8	22	24.5	25.8	9.2	21	21.8	23.5	24.9	8.1	11.8	13.3	15.5	17.9	17.8	21.1	22
16	Eucalyptus globulus	6.1	10.9	13	15.1	26.7	6.1	7.6	10.2	12.8	15.1	40.8	46.5	50.7	54.4	87.8	41.3	262	364.1	520.8	607.7	16.5	20	24	28.6	38.3	-4	0.5	3.8	6.8	19.1	9.8	15	20.2	26.9	31	1.8	6.5	11.9	18.6	31.5	4.1	9.4	15.3	19.2	23.8	10.5	14.7	17.5
17	Eucalyptus gomphocephala	13.1	14.3	17.6	19.1	20.3	7	8.6	10.8	12.4	14.1	44.6	48	51.5	55.3	60.8	258.6	313.9	376.8	429.9	611.2	22.8	24.1	29.3	31.9	35.2	0.5	5.1	8.3	9.7	10.5	15.3	17.1	21	23.5	30.3	8.6	11.3	13.7	14.9	24.5	10.6	17.7	21.9	23.9	25.2	17.5	18.9	22.4
18	Eucalyptus grandis	12.2	17.4	19	20.8	24.8	6.4	9.5	10.8	12.1	14.7	45.2	49.1	52.4	56	89.6	37.1	289.8	360.6	409.7	653.8	21.7	27.2	28.5	29.7	37.7	0.3	5.6	7.9	10.2	19.8	10.1	18.4	20.6	23	32.3	9	20.8	22.6	24.4	28.7	8.2	13.1	15.2	17.3	23.9	15.9	21.8	23.1
19	Eucalyptus grisea	16	16	17.1	18.5	20.1	14.9	14.9	15	15.3	15.5	49.9	51.6	53.2	53.9	53.9	490.6	490.6	506.6	541.3	584.1	28.9	28.9	30.3	32.2	34.4	1.2	1.2	2	2.9	4.6	27.6	27.6	28.3	29.7	31.1	21.6	21.6	22.9	24.7	26.7	10.7	10.7	11.9	12.9	14.9	21.6	21.6	22.9
20	Eucalyptus longirostrata	13.2	17.4	19.1	20.8	22.7	8.8	12.1	13.7	15.1	15.4	45.3	49.7	52.5	54.3	56	335.2	398.8	465	526.3	591.7	26.4	28.9	31.2	32.9	34.2	0.3	3.1	5	7.8	10.9	17.6	22.9	26.2	29	29.8	9	22.2	24.2	25.9	27.7	8.2	12.8	14.1	16.2	20.3	19	22.5	24.4
21	Eucalyptus macarthurii	8.9	10.6	13.3	13.6	17.4	7.8	10.3	11.4	12.2	13.9	44.3	45.8	47.5	48.6	52	279.4	409.3	452	480.7	555.8	19	23.5	25.8	27.1	31	-0.5	0.6	1.8	2.9	8.5	15.8	22	24	25.6	29.4	5.8	12.2	17	18.9	22.2	5.3	5.8	9	14.5	22.8	13.5	16.2	18.8
22	Eucalyptus major	13.5	16.7	19.2	20.7	21.7	8.2	10.2	12.4	15.2	15.6	45.3	49.3	52	54.1	54.8	322.6	371.3	426.1	534.5	591.7	24.4	28.4	30.2	32.5	33.5	0.3	2	6.3	9.2	11.2	17.5	20.3	23.9	29.3	30.6	9	21.6	23.6	25.6	25.9	10.4	11.8	14.9	17.1	20.3	19.5	22.3	24
23	Eucalyptus marginata	12	14.5	16.7	18.9	19.9	7.5	9.4	11.4	13.7	14.8	46.7	50	52.8	57.5	60.9	234.3	276.7	383.5	487.9	542.7	21.8	24.4	28.9	32.6	34.6	0.5	5	7.2	9.5	10.3	14.9	16.7	21.6	26.7	28.8	9	10.4	12.5	14.4	22.2	10.5	18.1	21.1	24	25.6	16.3	18.7	21.6
24	Eucalyptus microcarpa	11.1	13.7	15.7	18	23.1	7.9	10.3	12.8	14.6	16	44.2	45.1	48.1	52	54.1	305.4	375.9	514.4	614.8	652.7	23.3	26.9	30.5	34.1	37.2	-0.3	2.4	3.8	6.9	9.8	16.6	20.5	26.7	30.7	32.1	6	8.1	12	24	28	7.6	12.9	18.6	21.6	23.6	16.5	19.4	22
25	Eucalyptus moluccana	10.9	15.4	17.8	20.3	24.4	5.6	10.7	12.6	14.8	16.1	40.1	48.2	50.5	53.5	59.5	194.8	382.9	449	542.1	639.2	24.8	27.8	29.8	32.2	36.8	-1.4	1.5	4.8	8.1	17.3	13.8	21.2	24.9	29.2	31.6	8.1	20.1	22.5	25.3	28	5.7	10.7	13.2	16.1	23.3	16.9	21	23.1
26	Eucalyptus nitens	7.8	8.9	11.5	17.4	26.8	7.3	9.5	11	12.1	14.1	42	43.4	48.3	52	74.2	99.1	342.8	420.1	465.1	637.4	18.5	22	23.9	28.9	36.4	-2	-1.5	1.2	4.6	21.3	11.4	19.5	22.7	25.1	31.3	2.5	3.4	11.8	22.2	27.5	4.5	5.2	11.6	17.4	25.5	13	14.6	16.7
27	Eucalyptus occidentalis	12.2	13.8	15.8	17	19.6	7.9	9.1	11.5	13.1	14.5	46.4	47.8	54.1	60.4	63.4	251.9	281.1	365	465.8	574.6	22.3	24.5	27.3	30.8	36	0.3	4.4	6.1	7.7	9.5	16.3	17.7	21.3	25.6	29.7	7.4	10.4	11.9	14.1	18.7	10.4	17.7	19.9	22	23.3	16.9	18.6	20.3
28	Eucalyptus pellita	13.5	20.9	23.8	26.8	28.3	6.8	7.7	9	10.7	13.5	47.3	52.4	58.4	71.1	89.6	23.4	103.3	233.6	338.4	527.8	24.1	29.5	31.1	32.8	34.2	0.5	10.4	15.5	21.4	24.4	7.6	11.3	15.7	20.3	28.2	11.6	23.8	26	27.8	28.3	10.5	17.8	21.5	26	28.4	19.3	24.2	26.4
29	Eucalyptus propinqua	11.4	16.8	18.5	20.2	21.5	8	9.8	11.2	12.7	14.5	47	49.2	51.8	54	55.6	296.2	345	385.6	432.5	550.9	23.7	27.4	28.5	29.9	32.6	-2	4.6	6.9	9.2	10.6	16.4	19.4	21.6	24.3	29	11.6	20.7	22.5	24.2	25.9	5.8	12.6	14.3	16.3	19.3	17.6	21.5	22.9
30	Eucalyptus punctata	10.9	13.6	16.5	18.3	20.9	7.9	9.6	11.9	13.9	15.3	45.5	47.9	49.9	52.3	54.5	303.1	364.1	432.3	516.7	575.1	21.5	26.3	28.2	31	34.4	-0.7	1.5	4.5	7.8	9.8	16.6	19.4	23.7	28	30.4	8.1	18.8	20.8	23.1	25.4	6.4	8.6	12.2	14.4	23.4	16.1	19.2	21.7
31	Eucalyptus raveretiana	17.4	17.4	22	24	26.1	8.8	10	11.4	12.7	15	47.7	49.1	51.7	54.9	57.9	254.2	309.3	386.8	433	542.3	28.9	28.9	31.7	34	37.9	3.9	4.6	9.7	13.1	14.4	17.2	18.4	22	24.3	29.1	22.2	22.2	26.1	28	30.1	11.8	12.8	17.9	20	22.9	22.5	22.5	26.3
32	Eucalyptus robusta	9.3	17.3	18.8	20.4	24.4	6.2	9	10	11.2	13.7	43.8	47.6	50.2	52.4	85.4	32.5	330.1	365.9	407.6	558.3	19.1	26.5	27.9	29.4	32.6	-1.9	6.4	8.1	10	18.2	11.2	17.9	19.9	22.1	28.6	2.8	19.8	21.8	24.2	27.6	8.3	13.4	15.2	17.2	23.9	14.7	21.6	23.1
33	Eucalyptus saligna	11.1	13.9	16.9	19	24.4	7.5	9.5	11.2	12.9	15.3	44.3	47.9	50.6	53.8	58.1	259.5	348.3	403.1	465.3	627.4	20.6	25.7	27.6	29.3	37.4	-0.6	1.7	5.4	7.9	13	15	19.1	22.2	25.5	30.7	7.7	18.6	20.7	23.1	29.9	6.5	9	12.7	15.4	21.9	15.4	19.2	21.6
34	Eucalyptus siderophloia	13	17.3	18.7	20.5	23.2	7	9.8	11.1	12.7	15.1	44.6	48.4	51.5	53.8	55.3	279.8	336.9	387.2	432.8	629.4	21.1	27.5	28.7	30.4	34.5	0.3	5	7.1	9.7	14.9	14.9	19	21.6	24.3	31.2	8.1	20.8	22.7	24.8	27.3	9.1	12.9	14.6	16.5	22.5	16.6	22.1	23.2
35	Eucalyptus sideroxylon	10.8	14.1	16.4	18.5	23.5	7	10.2	13.5	15.1	16.2	43.1	44.9	47.8	51.4	60.8	258.6	393.1	543.5	622	643.4	21	26.8	31.3	34.2	36.1	-2	0.8	3.1	6.2	10.1	14.8	20.9	28.2	30.9	31.6	4.8	7.9	17.3	24.3	28.2	5.5	10.8	15.7	21.4	23.6	15.5	19.9	23
36	Eucalyptus smithii	8.7	12	14.6	15.9	19.6	6.3	9.2	10.5	12.3	14.4	40.4	47.4	50.1	52.2	53.5	314.1	341.1	377.3	459.7	575.9	22.2	24.4	25.3	26.6	32.6	-2.4	0.5	4.4	6.3	8.4	15.6	18.8	21	25.1	30.1	4.7	13.7	17.6	19.8	24.1	4.1	7.6	11.2	17.8	19.7	14.5	17.2	19.2
37	Eucalyptus tereticornis	8.3	14.5	18.1	22.1	27.6	4.7	9.4	11.6	13.8	16	33.1	48.2	51.2	54	86.7	34.2	329.1	405.5	490.4	629.3	22.1	25.8	28.9	31.8	37.9	-2.9	2.3	6.2	10.7	22.6	8.3	18.5	22.7	27.1	31.4	2.6	17	22.1	26	30.1	4.8	10.1	14.1	19.1	27.1	14.5	19.4	22.9
38	Eucalyptus thozetiana	13.5	20.2	21.9	23.9	27.4	10.6	13	14.5	15.4	16	43.5	46.4	50	54.3	61.2	175	422.7	549.8	639.9	670.6	28.7	33.3	35.4	38	39.4	0.3	3.8	6.2	9.3	17.5	17.4	24.7	29.2	32.4	32.8	18.6	25.8	27.9	30.2	31	10.5	14.2	16.4	19.3	24.8	20	26.4	28.1
39	Eucalyptus tricarpa	10.6	13.6	14.9	15.8	18.1	6.9	8.8	10.4	12.6	14.1	42.2	48.1	50.1	52.7	54	292.8	302.4	381.6	494.7	602.5	21.7	23.6	25.9	29.5	32.5	0.3	3.1	5.1	6.5	8.1	15.2	17.1	20.9	26	30.6	5.4	8.2	15	18.9	22.2	8.6	11.4	15.2	19.7	22.4	15.9	18.1	19.6
40	Eucalyptus urophylla	15.6	18.4	23.4	27	27.7	5.9	5.9	7.1	8.4	11	51.2	57.8	64.9	73.1	79.8	33.4	59.7	110.3	156.7	377.6	21.2	23.9	28.5	31.8	33.5	9.1	11.7	17.5	21.8	22.5	8.5	8.8	11	12	21.5	16.6	19.4	24	27.3	27.7	14	16.7	22.3	26.1	27.7	16.7	19.8	24.5
41	Eucalyptus viminalis	6.1	10.2	13	15.1	19.8	6.3	8.5	10.8	13.4	15.5	40.8	46.8	49.9	53.2	85.4	32.5	293	397	522.3	614.6	16.8	20.9	24.9	28.3	35.2	-4	-1.6	3.2	6.5	12.8	12	16.6	21.8	27.6	31.2	0.3	6.2	11.9	18.7	27.1	1.7	6	15	19.8	24	10.6	14.9	17.9
42	Eucalyptus wandoo	13.5	15.1	17.3	19.5	20.4	9.4	11.2	13	14.5	15	47.7	49.4	51.3	55.2	58.4	275.4	346.7	468.8	545.2	565.4	24.3	26.7	31.6	35.1	36.1	0.5	4.9	6.2	8.5	9.7	16.4	20.5	25.4	28.7	29.6	10	10.5	11.9	14.3	25.8	10.5	19.3	22.6	25	25.7	17.9	19.6	23.1
[truncated: 52 more columns]
