# Supplementary material for: A new environmental-based tool to support forest breeders in selecting species adapted to current and near-term climate conditions
Source: Research Square preprint supplement (doi:10.21203/rs.3.rs-8693101/v1), 2026-02-09
Supplement: Supplementary file 4 [file 6954dff4459cc29154706ba5.docx]

**Software and R packages references**

**R Core Team** (2023). *R: A Language and Environment for Statistical Computing*. R Foundation for Statistical Computing, Vienna, Austria.

**Hijmans, R.J.** (2023). *terra: Spatial Data Analysis*. R package version **1.8-86**.

**Wickham, H.** (2016). *ggplot2: Elegant Graphics for Data Analysis*. Springer-Verlag New York. (ggplot2 v**4.0.1**)

**Wickham, H., François, R., Henry, L., & Müller, K.** (2023). *dplyr: A Grammar of Data Manipulation*. R package version **1.1.4**.

**Wickham, H.** (2023). *stringr: Simple, Consistent Wrappers for Common String Operations*. R package version **1.6.0**.

**Wickham, H. & Henry, L.** (2023). *tibble: Simple Data Frames*. R package version **3.3.0**.

**Wickham, H.** (2023). *tidyr: Tidy Messy Data*. R package version **1.3.2**.

**Sievert, C.** (2024). *plotly: Create Interactive Web Graphics via “plotly.js”*. R package version **4.11.0**.

**Cheng, J., Karambelkar, B., & Xie, Y.** (2024). *leaflet: Create Interactive Web Maps with the JavaScript “Leaflet” Library*. R package version **2.2.3**.

**Cheng, J., Allaire, J., Sievert, C., et al.** (2024). *shiny: Web Application Framework for R*. R package version **1.12.1**.

**Chang, W. & Cheng, J.** (2024). *shinydashboard: Create Dashboards with Shiny*. R package version **0.7.3**.

**Attali, D.** (2024). *shinyjs: Easily Improve the User Experience of Shiny Apps in Seconds*. R package version **2.1.0**.

**Perrier, V., Meyer, F., & Granjon, D.** (2024). *shinyWidgets: Custom Inputs Widgets for Shiny*. R package version **0.9.0**.

**Xie, Y.** (2024). *knitr: A General-Purpose Package for Dynamic Report Generation in R*. R package version **1.51**.

**Zhu, H.** (2024). *kableExtra: Construct Complex Tables with “kable()” and Pipe Syntax*. R package version **1.4.0**.

**Cheng, J., Xie, Y., & Tan, X.** (2024). *DT: A Wrapper of the JavaScript Library “DataTables”*. R package version **0.34.0**.

**Kassambara, A.** (2023). *factoextra: Extract and Visualize the Results of Multivariate Data Analyses*. R package version **1.0.7**.

**Phillips, S.J.** (2023). *maxnet: Fitting MaxEnt Species Distribution Models with “glmnet”*. R package version **0.1.4**.

**Kolde, R.** (2024). *pheatmap: Pretty Heatmaps*. R package version **1.0.13**.

**Robin, X., et al.** (2024). *pROC: Display and Analyze ROC Curves*. R package version **1.19.0.1**.

**Wickham, H.** (2024). *scales: Scale Functions for Visualization*. R package version **1.4.0**.

**Sievert, C. & Garnier, S.** (2024). *viridis: Default Color Maps from “matplotlib”*. R package version **0.6.5**.

**Garnier, S.** (2024). *viridisLite: Default Color Maps from “matplotlib” (Lite)*. R package version **0.4.2**.

**Maechler, M., Rousseeuw, P., Struyf, A., Hubert, M., & Hornik, K.** (2024). *cluster: Cluster Analysis Basics and Extensions*. R package version **2.1.8.1**.

**Sievert, C. & RStudio Team** (2024). *bslib: Custom “Bootstrap” Styles for Shiny and R Markdown*. R package version **0.9.0**.
