# Supplementary material for: A new environmental-based tool to support forest breeders in selecting species adapted to current and near-term climate conditions
Source: Research Square preprint supplement (doi:10.21203/rs.3.rs-8693101/v1), 2026-02-09
Supplement: Supplementary file 5 [file 8e17d7d30244327791b82fe5.xlsx]

## Sheet: S5_MaxEnt_results
species	cluster	Euclidian	Mahalanobis	MaxEnt
Eucalyptus nitens	5	10.4027	893.527	0.655804
Eucalyptus tereticornis	5	6.93159	300.276	0.646685
Eucalyptus smithii	5	9.96321	822.975	0.610493
Eucalyptus viminalis	5	9.63646	606.015	0.593519
Eucalyptus camaldulensis	5	8.5439	289.685	0.592343
Eucalyptus robusta	5	7.35908	523.429	0.591549
Eucalyptus grandis	5	6.43854	357.586	0.583584
Corymbia citriodora	5	8.12186	384.724	0.543958
Corymbia maculata	5	7.5459	279.944	0.540928
Eucalyptus brassiana	5	2.13418	10.8503	0.537472
Eucalyptus moluccana	5	7.89436	320.258	0.535824
Eucalyptus smithii	1	11.5479	3138.36	0.526788
Eucalyptus tricarpa	1	11.5148	2189.75	0.515684
Eucalyptus punctata	5	8.85989	498.65	0.509167
Eucalyptus siderophloia	5	7.41676	376.407	0.504668
Eucalyptus microcarpa	5	9.50148	415.857	0.496346
Eucalyptus camaldulensis	3	11.9727	1105.87	0.489698
Eucalyptus diversicolor	2	8.09026	1726.56	0.489075
Corymbia henryi	5	7.51126	323.904	0.48813
Eucalyptus propinqua	5	7.52957	414.115	0.479635
Eucalyptus globulus	5	10.189	760.721	0.479458
Eucalyptus tricarpa	5	9.99109	631.612	0.476367
Eucalyptus tricarpa	3	12.7887	1333.64	0.474875
Eucalyptus viminalis	3	12.4497	997.919	0.473048
Eucalyptus dorrigoensis	5	8.72183	616.659	0.469503
Eucalyptus camaldulensis	1	10.3855	1043.19	0.464686
Eucalyptus saligna	5	8.11888	514.921	0.463869
Eucalyptus microcarpa	3	12.8284	1197.26	0.463592
Eucalyptus macarthurii	5	11.3824	979.073	0.459685
Corymbia torelliana	5	8.18391	401.976	0.459334
Eucalyptus dunnii	3	10.8135	2538.77	0.458234
Eucalyptus dunnii	5	7.88466	444.4	0.45804
Eucalyptus pellita	5	3.04186	91.8416	0.453693
Eucalyptus sideroxylon	5	9.67131	397.736	0.452657
Eucalyptus drepanophylla	5	3.43976	44.0985	0.446148
Eucalyptus amplifolia	5	8.67776	479.894	0.444878
Eucalyptus globulus	3	12.8422	1132.6	0.440208
Eucalyptus badjensis	3	14.1387	2095.77	0.435303
Eucalyptus deglupta	5	4.28967	175.511	0.43503
Eucalyptus cladocalyx	3	11.5771	794.047	0.429147
Eucalyptus dunnii	1	9.69206	2370	0.417727
Eucalyptus viminalis	4	11.929	2570.38	0.415858
Corymbia maculata	3	10.8289	1750.44	0.415268
Eucalyptus benthamii	3	13.2063	2857.7	0.41446
Eucalyptus dorrigoensis	3	11.4439	2757.89	0.412118
Eucalyptus nitens	3	13.2258	1414.14	0.411097
Eucalyptus sideroxylon	3	13.051	2128.46	0.409139
Eucalyptus punctata	3	11.9285	2302.41	0.408615
Eucalyptus diversicolor	3	9.40985	509.5	0.407534
Eucalyptus tereticornis	3	9.98399	2045.24	0.405063
Eucalyptus major	3	10.4623	2463.95	0.402098
Eucalyptus viminalis	1	11.0508	1996.48	0.401053
Eucalyptus globulus	1	11.5651	2617.33	0.399558
Eucalyptus robusta	3	10.152	2041.67	0.398565
Eucalyptus thozetiana	5	7.39863	126.325	0.397297
Eucalyptus benthamii	5	9.69403	497.091	0.39646
Eucalyptus deglupta	1	4.08284	665.695	0.395809
Eucalyptus macarthurii	3	14.2918	2370.38	0.394746
Eucalyptus grisea	5	9.43164	276.392	0.393835
Eucalyptus amplifolia	3	11.8384	2436.38	0.393691
Eucalyptus saligna	3	11.1469	2235.18	0.392768
Eucalyptus camaldulensis	2	10.3365	1637.83	0.392315
Corymbia henryi	3	10.6892	2379.47	0.391348
Eucalyptus marginata	3	9.78812	596.452	0.390387
Eucalyptus smithii	2	11.6337	5220.83	0.388641
Corymbia torelliana	3	11.3589	1790.49	0.38784
Eucalyptus occidentalis	3	11.4306	772.595	0.385893
Eucalyptus deglupta	4	4.05188	1129.94	0.385771
Eucalyptus wandoo	3	10.3713	807.112	0.385596
Eucalyptus urophylla	5	1.89846	44.1031	0.38466
Eucalyptus moluccana	3	11.3545	2563.98	0.38456
Eucalyptus propinqua	3	10.4887	2307.69	0.383968
Eucalyptus microcarpa	1	11.2425	1538.76	0.380769
Eucalyptus siderophloia	3	10.4473	2303.62	0.380484
Eucalyptus tereticornis	1	8.81271	1835.59	0.379993
Eucalyptus longirostrata	3	11.8837	2796.77	0.378505
Eucalyptus gomphocephala	3	9.72453	608.503	0.374807
Eucalyptus cladocalyx	5	8.77566	437.066	0.37192
Corymbia citriodora	3	11.3012	1782.98	0.370521
Corymbia maculata	1	9.53155	1753.93	0.369121
Eucalyptus raveretiana	5	4.79251	79.102	0.368931
Eucalyptus benthamii	4	12.6064	3878.32	0.362326
Eucalyptus grandis	3	9.27467	2151.31	0.361909
Eucalyptus major	1	9.19963	1737.3	0.361181
Eucalyptus propinqua	1	9.3597	2285.2	0.357154
Eucalyptus cladocalyx	1	10.0989	1382.93	0.353665
Eucalyptus punctata	1	10.6803	2617.15	0.351845
Eucalyptus dorrigoensis	1	10.4025	3043.63	0.351626
Eucalyptus robusta	1	9.0933	2527.48	0.346407
Eucalyptus sideroxylon	1	11.6072	2047.04	0.345908
Eucalyptus siderophloia	1	9.2924	2166.65	0.345428
Eucalyptus major	5	7.17923	262.515	0.345
Eucalyptus deglupta	3	3.90362	353.891	0.342902
Eucalyptus saligna	1	9.96434	2613.79	0.342856
Eucalyptus raveretiana	3	8.51306	2350.81	0.340579
Eucalyptus drepanophylla	3	7.13375	2092.41	0.339622
Eucalyptus longirostrata	1	10.33	1585.29	0.33784
Eucalyptus amplifolia	1	10.575	2560.3	0.337391
Eucalyptus smithii	3	12.7863	1688.16	0.334158
Eucalyptus globulus	4	12.3936	3457	0.332214
Eucalyptus thozetiana	3	11.5431	3438.17	0.330637
Eucalyptus grisea	3	13.3634	3455.56	0.328764
Eucalyptus tereticornis	2	8.87054	2963.33	0.327047
Eucalyptus tricarpa	4	12.3355	2914.18	0.326929
Eucalyptus gomphocephala	4	8.98759	810.159	0.324935
Eucalyptus moluccana	1	9.96422	1980.02	0.324403
Eucalyptus badjensis	5	11.1374	933.974	0.322498
Eucalyptus longirostrata	5	8.09477	226.241	0.322226
Eucalyptus pellita	1	4.33083	618.287	0.32177
Eucalyptus thozetiana	1	9.84412	913.605	0.320453
Eucalyptus microcarpa	4	12.1739	2067.36	0.320103
Eucalyptus marginata	2	8.10108	919.948	0.319679
Eucalyptus raveretiana	1	7.12041	824.369	0.317718
Eucalyptus tricarpa	2	11.5951	3436.27	0.316502
Eucalyptus nitens	1	11.9801	3310.26	0.315641
Eucalyptus camaldulensis	4	11.2844	1670.14	0.313435
Eucalyptus grandis	1	8.23345	1971.14	0.309904
Eucalyptus cladocalyx	4	11.0041	1773.35	0.30967
Corymbia maculata	2	9.56631	2795.73	0.308876
Eucalyptus urophylla	1	2.3	194.285	0.30686
Eucalyptus wandoo	2	8.58816	1005.52	0.305773
Eucalyptus pellita	2	4.40024	967.834	0.304585
Corymbia citriodora	1	10.0312	2202.2	0.304434
Eucalyptus deglupta	2	4.34897	1212.36	0.30248
Eucalyptus diversicolor	4	8.89715	1354.96	0.299322
Eucalyptus punctata	2	10.7453	4238.7	0.294262
Eucalyptus sideroxylon	2	11.6208	3214.94	0.292406
Corymbia torelliana	1	10.0846	2275.03	0.291813
Eucalyptus occidentalis	1	9.89176	1238.54	0.291436
Eucalyptus pellita	3	4.96696	1357.92	0.291046
Eucalyptus smithii	4	12.3487	4531.45	0.286858
Eucalyptus cladocalyx	2	10.1275	2126.53	0.286732
Eucalyptus saligna	2	10.0354	4301.49	0.285226
Eucalyptus robusta	2	9.18803	4247.91	0.284405
Eucalyptus marginata	4	9.09454	849.668	0.283574
Eucalyptus viminalis	2	11.098	3149.21	0.283145
Corymbia henryi	1	9.42859	2030.3	0.279737
Eucalyptus longirostrata	2	10.2946	2480.13	0.279515
Eucalyptus globulus	2	11.6459	4200.67	0.276403
Eucalyptus macarthurii	1	13.0269	3972.21	0.274672
Eucalyptus wandoo	4	9.61986	960.282	0.271711
Eucalyptus siderophloia	2	9.36295	3532.14	0.270137
Eucalyptus brassiana	3	4.10181	973.359	0.269931
Eucalyptus moluccana	2	9.98172	3167.95	0.268907
Eucalyptus sideroxylon	4	12.4676	3096.09	0.268455
Eucalyptus dorrigoensis	2	10.5091	4987.1	0.267243
Eucalyptus nitens	4	12.7797	4644.35	0.266789
Eucalyptus gomphocephala	2	7.9692	895.057	0.266176
Eucalyptus propinqua	2	9.43886	3741.5	0.264933
Eucalyptus marginata	5	6.48741	196.396	0.264504
Eucalyptus badjensis	1	12.8153	3615.4	0.264061
Eucalyptus microcarpa	2	11.2272	2389.24	0.261655
Eucalyptus grisea	4	12.6343	3102.28	0.259958
Eucalyptus major	2	9.2399	2760.06	0.257024
Eucalyptus macarthurii	2	13.1004	6526.51	0.255612
Eucalyptus grandis	2	8.31642	3255.29	0.254874
Eucalyptus benthamii	1	11.7432	2531.19	0.25418
Eucalyptus thozetiana	2	9.72795	1424.92	0.253938
Eucalyptus amplifolia	2	10.6319	4153.03	0.251598
Eucalyptus diversicolor	1	8.02467	1091.61	0.25067
Eucalyptus tereticornis	4	9.52136	2968.14	0.250609
Corymbia citriodora	2	10.0835	3540.19	0.248596
Eucalyptus drepanophylla	1	5.83402	729.836	0.245541
Corymbia maculata	4	10.3079	2855.09	0.244076
Eucalyptus macarthurii	4	13.8388	5778.42	0.243844
Eucalyptus nitens	2	12.057	5429.1	0.242948
Eucalyptus grisea	1	11.732	1845.07	0.242525
Eucalyptus occidentalis	2	9.90544	1913.84	0.241135
Eucalyptus urophylla	3	3.29394	319.46	0.241101
Eucalyptus raveretiana	2	7.0887	1276.05	0.239158
Eucalyptus urophylla	2	2.42393	373.301	0.238523
Eucalyptus dunnii	2	9.77822	3853.18	0.233721
Eucalyptus punctata	4	11.4624	4046.42	0.2259
Eucalyptus grisea	2	11.6704	2881.09	0.224944
Corymbia torelliana	2	10.1374	3660.73	0.220011
Eucalyptus robusta	4	9.77768	3980.97	0.219153
Eucalyptus dorrigoensis	4	11.0823	4672.71	0.215886
Eucalyptus saligna	4	10.7027	4062.11	0.213284
Eucalyptus brassiana	1	3.93584	314.509	0.212704
Corymbia henryi	2	9.48617	3283.31	0.211581
Eucalyptus occidentalis	4	10.8177	1614.39	0.211402
Eucalyptus moluccana	4	10.7829	3192.31	0.209761
Eucalyptus siderophloia	4	10.0161	3439.4	0.202402
Eucalyptus propinqua	4	10.0701	3606.24	0.200181
Eucalyptus benthamii	2	11.75	4072.62	0.199531
Eucalyptus grandis	4	8.87899	3154.12	0.199394
Corymbia citriodora	4	10.8089	3480.85	0.194339
Eucalyptus dunnii	4	10.4018	3687.78	0.193068
Eucalyptus badjensis	2	12.8747	5925.54	0.185961
Eucalyptus badjensis	4	13.6479	5174.74	0.185691
Eucalyptus amplifolia	4	11.3563	3969.94	0.181565
Eucalyptus longirostrata	4	11.2033	2674.16	0.180175
Corymbia torelliana	4	10.8657	3584.27	0.171339
Eucalyptus brassiana	2	3.9897	409.074	0.167126
Eucalyptus thozetiana	4	10.732	1836.8	0.159928
Eucalyptus marginata	1	8.13838	580.574	0.15895
Corymbia henryi	4	10.1977	3241.07	0.156205
Eucalyptus gomphocephala	1	8.01767	567.456	0.155844
Eucalyptus raveretiana	4	7.87001	1529.22	0.155745
Eucalyptus pellita	4	4.64238	1044.92	0.150756
Eucalyptus urophylla	4	2.83642	350.699	0.146861
Eucalyptus major	4	9.95957	2835.21	0.143571
Eucalyptus occidentalis	5	8.45182	407.048	0.138312
Eucalyptus drepanophylla	2	5.79468	1092.6	0.135997
Eucalyptus brassiana	4	4.04253	616.745	0.132334
Eucalyptus drepanophylla	4	6.49561	1311.7	0.109665
Eucalyptus diversicolor	5	6.93963	365.203	0.0915
Eucalyptus wandoo	1	8.65242	618.105	0.081063
Eucalyptus gomphocephala	5	6.36762	194.334	0.0663531
Eucalyptus wandoo	5	6.85361	210.787	0.0508235
