# Supplementary figures and images for: A new environmental-based tool to support forest breeders in selecting species adapted to current and near-term climate conditions
Source: Research Square preprint supplement (doi:10.21203/rs.3.rs-8693101/v1), 2026-02-09

Suplementary Material 1 – Species Envelope by Biovariable
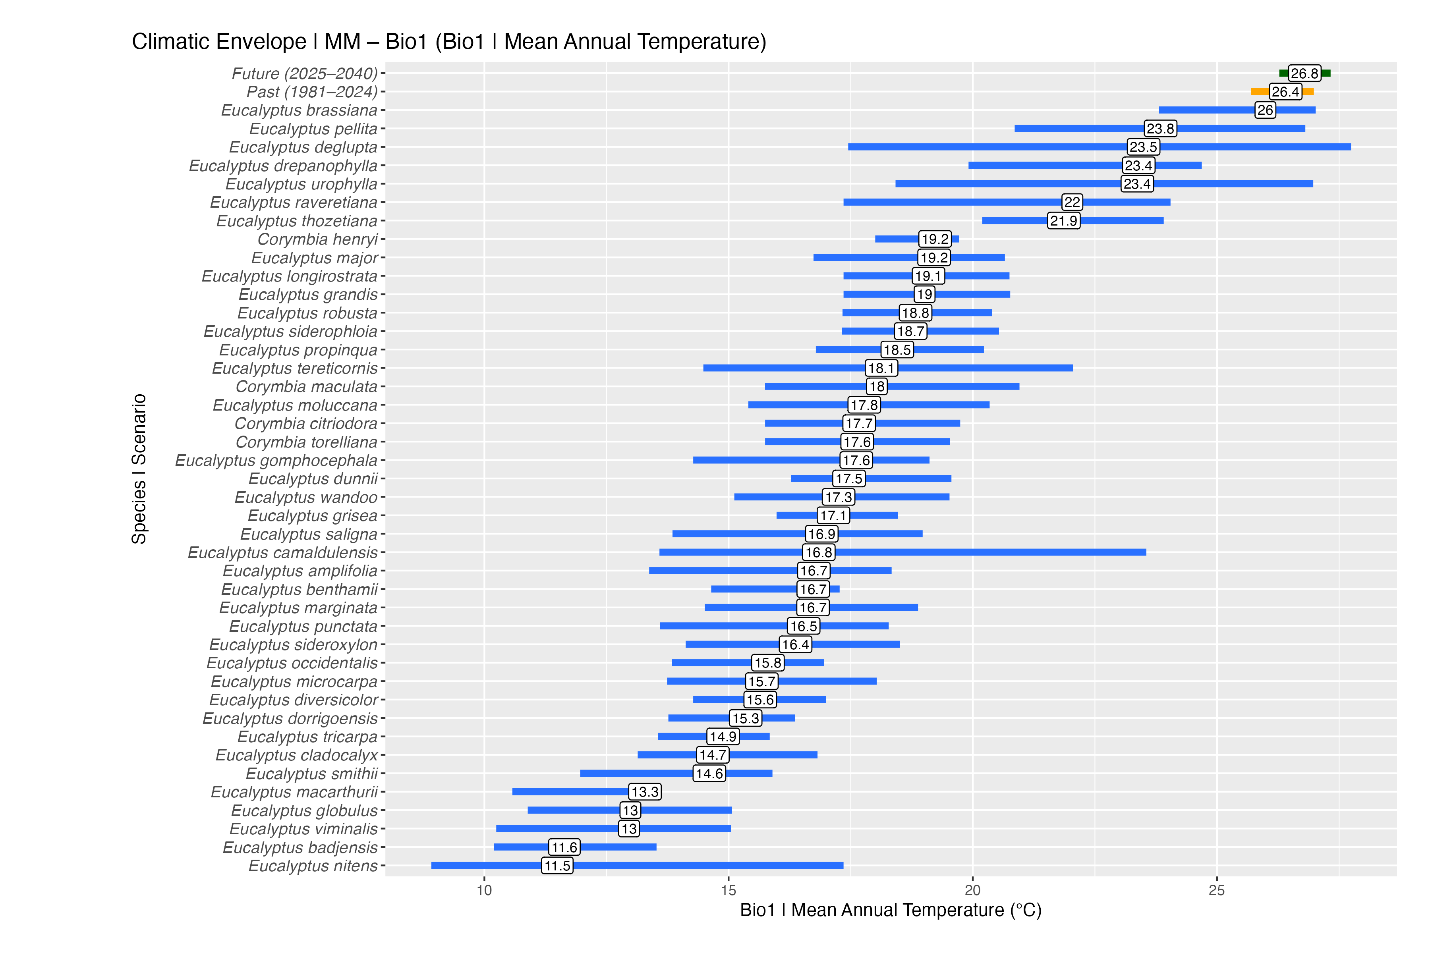

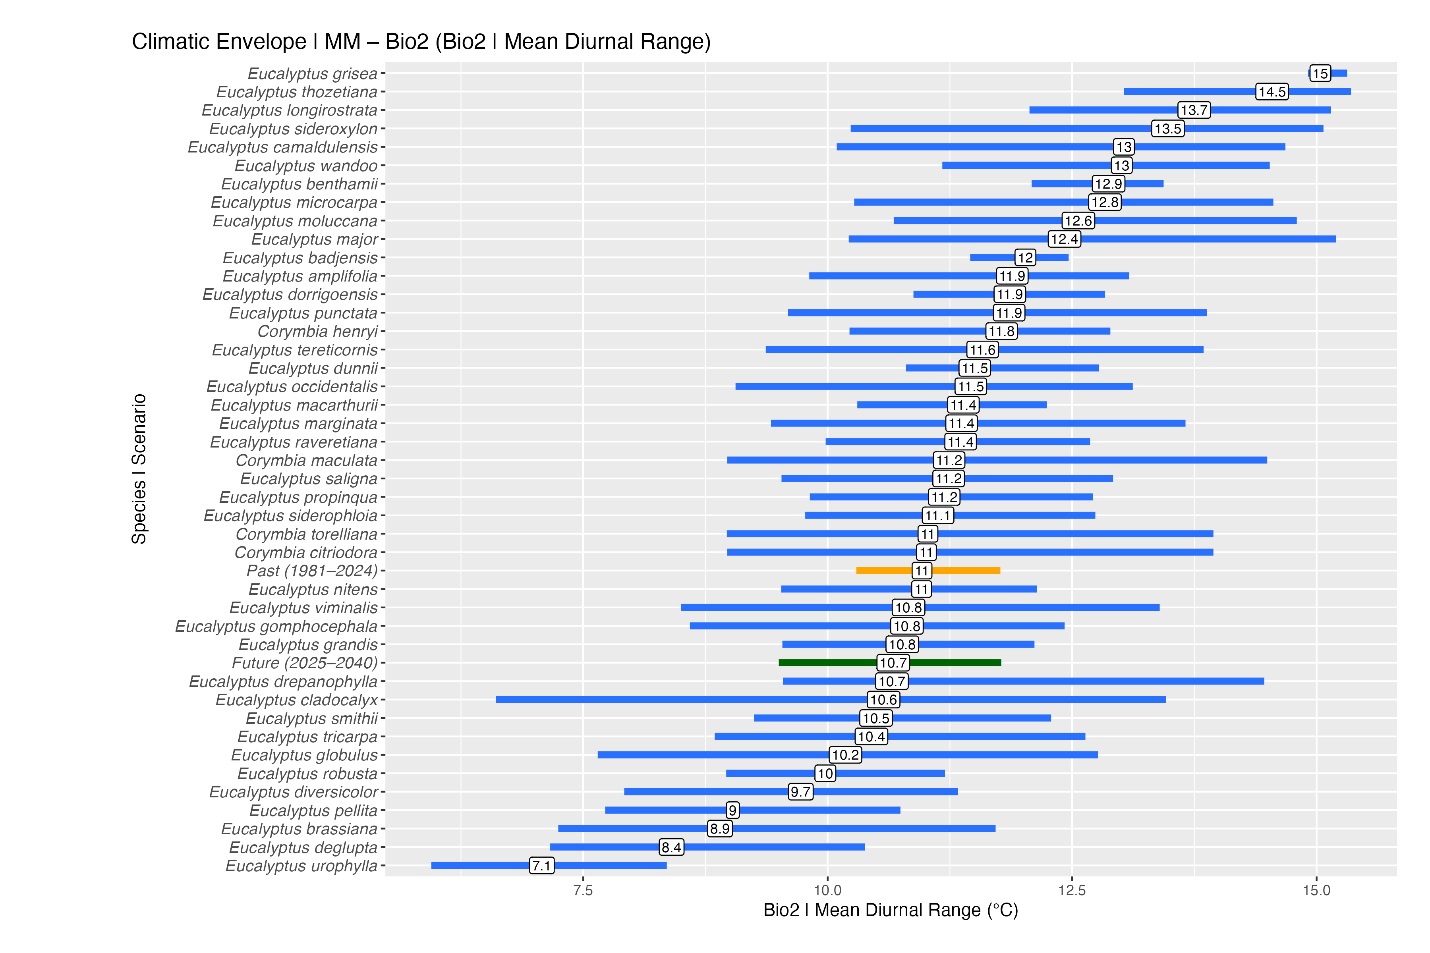

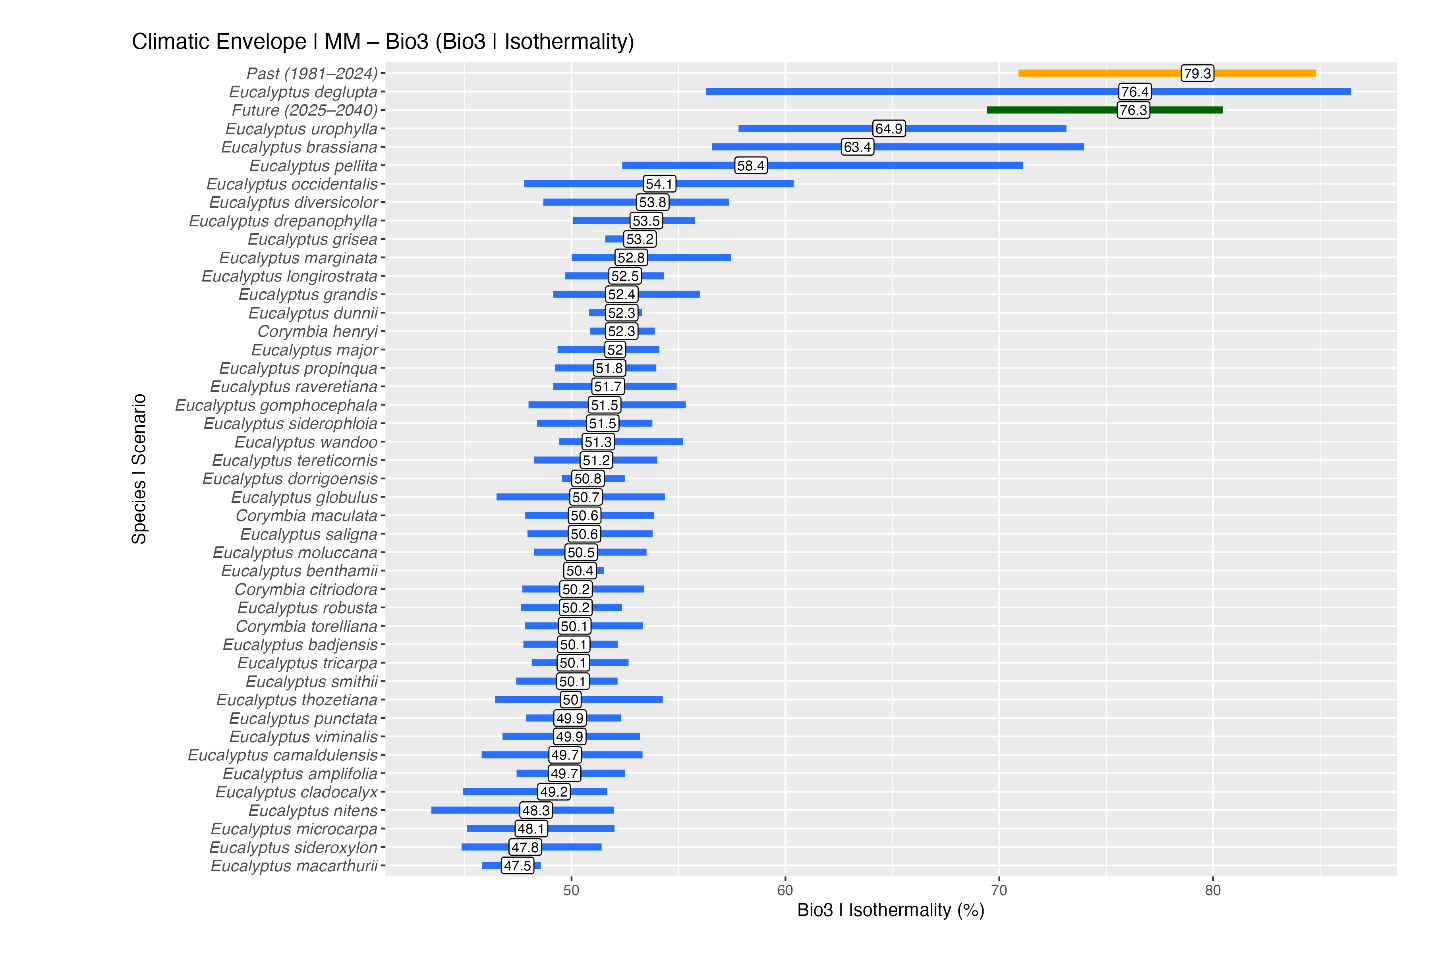

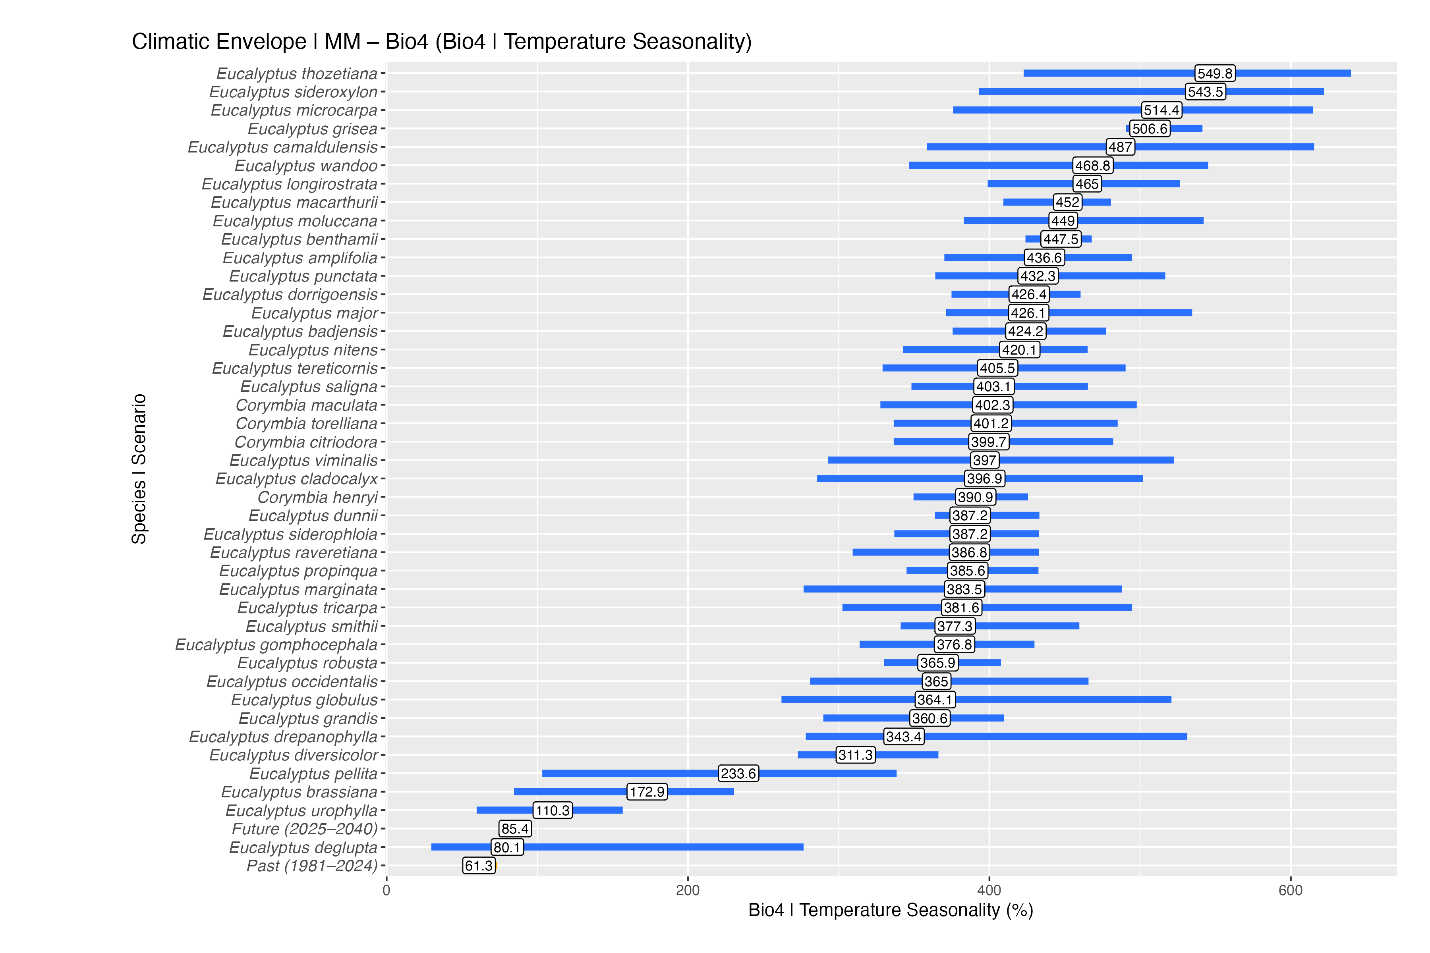

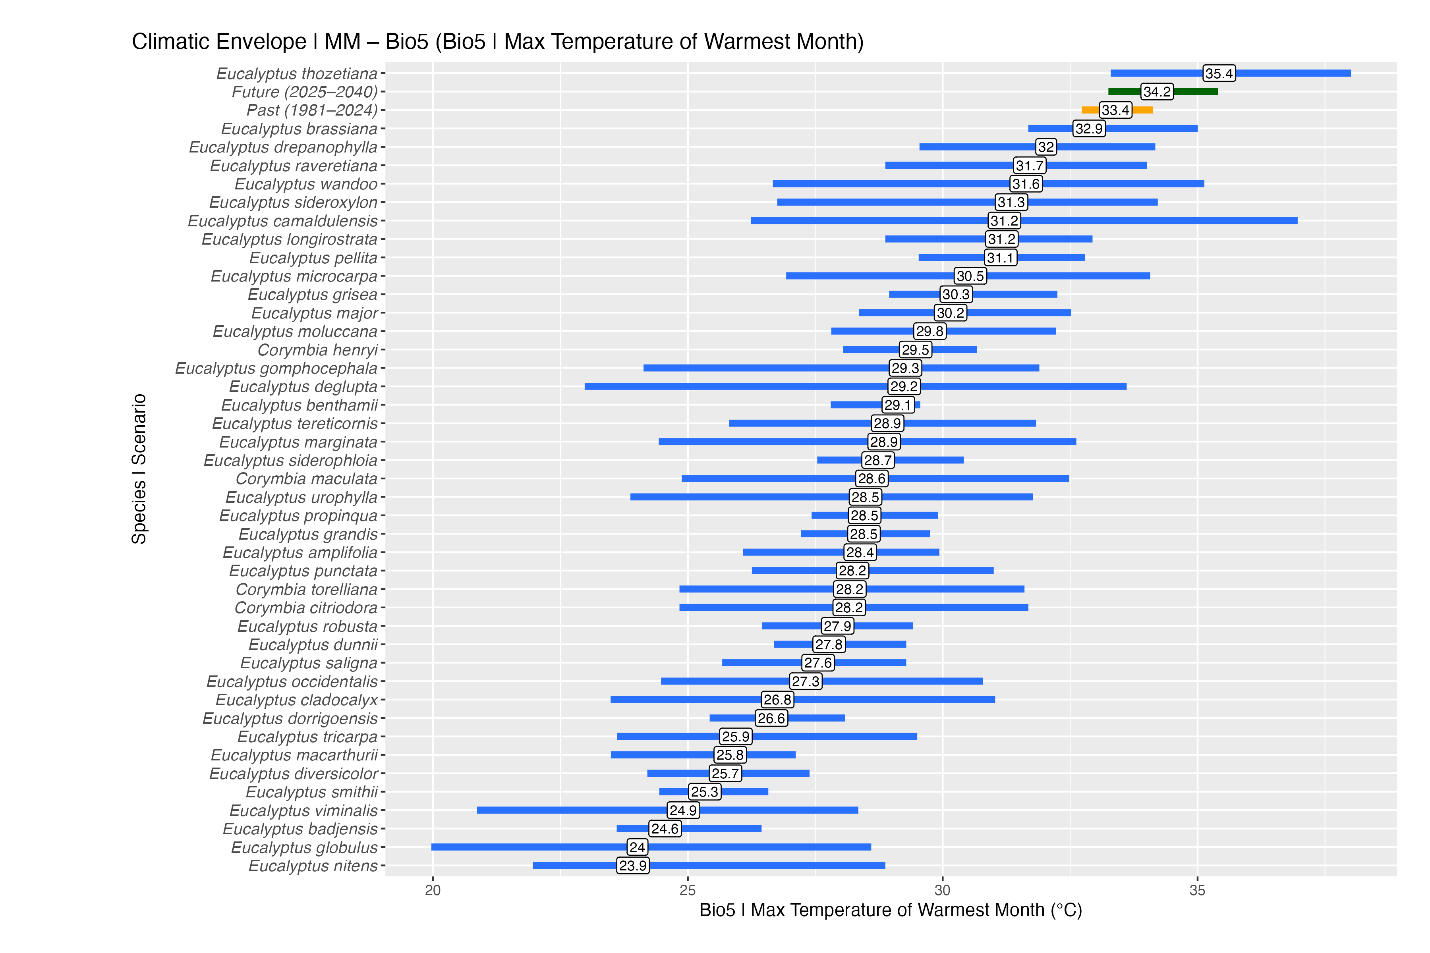

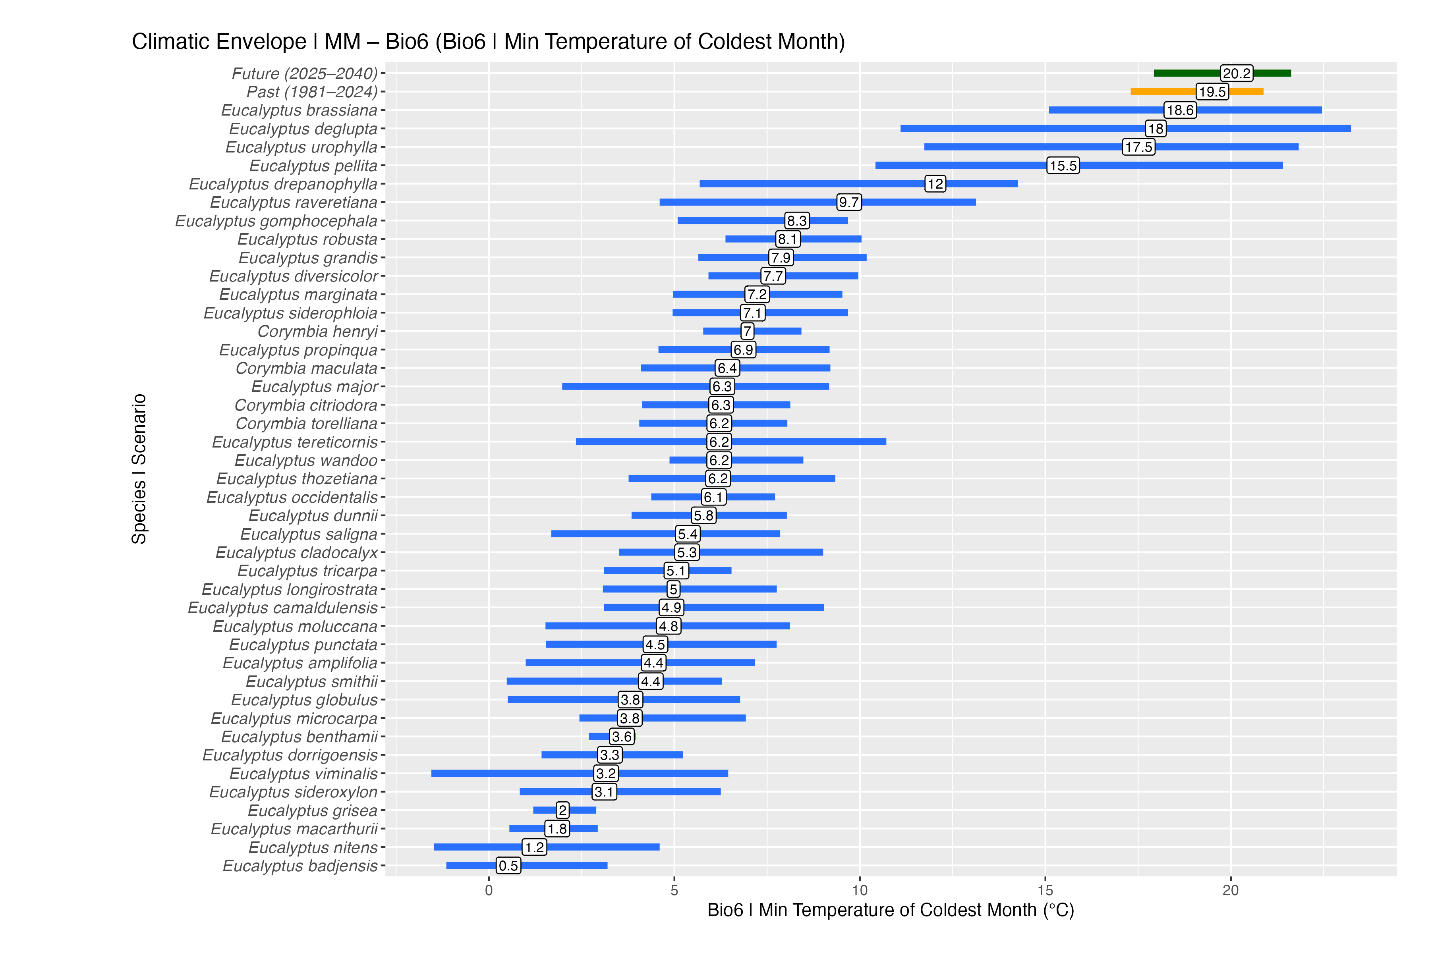

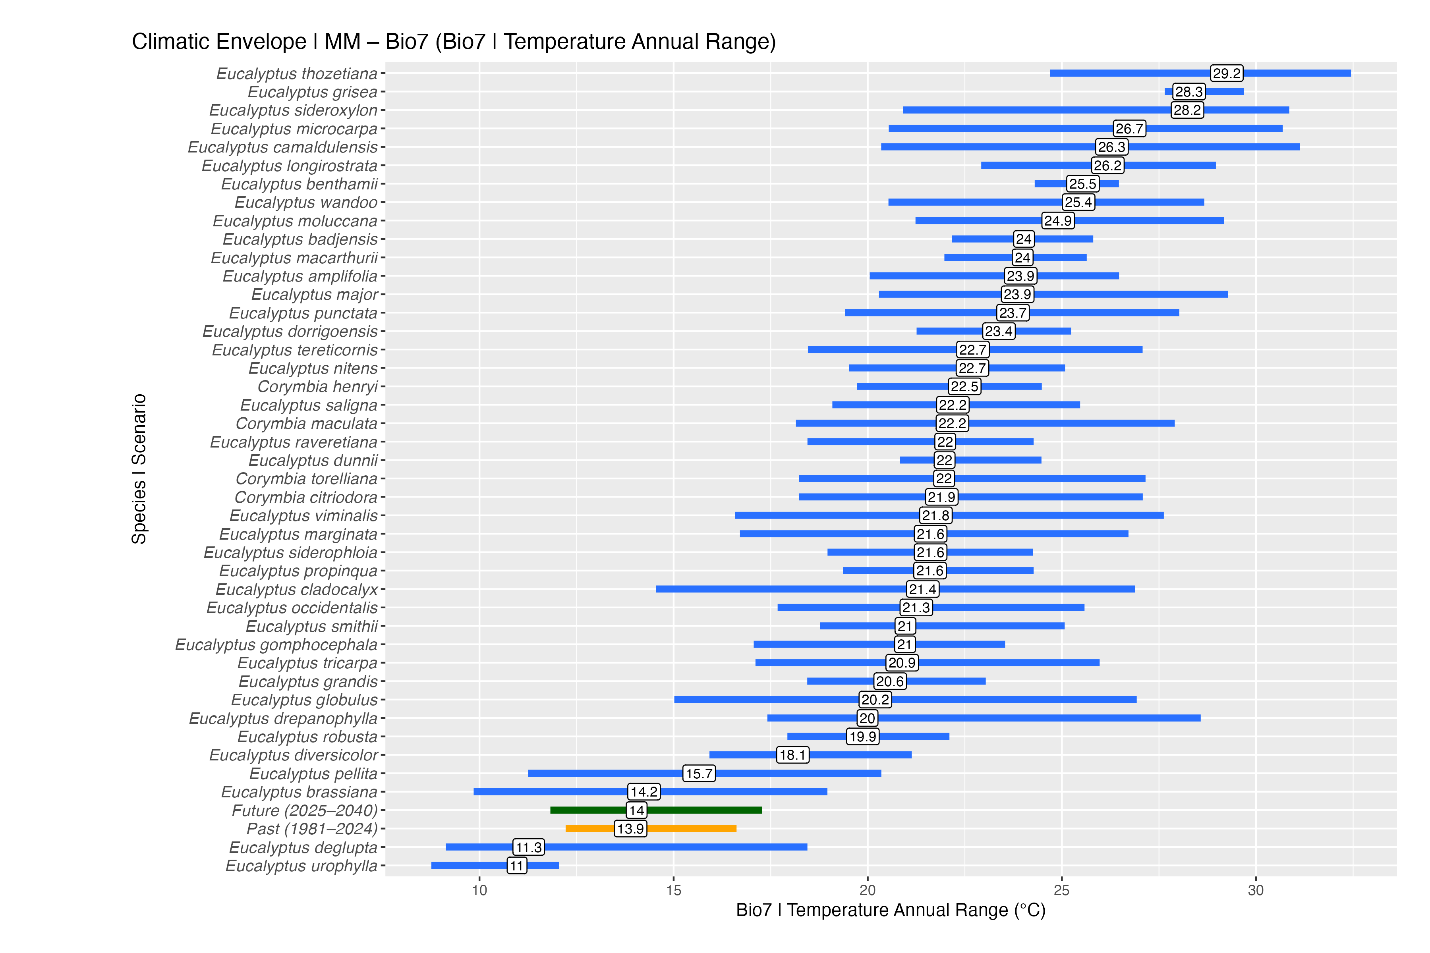

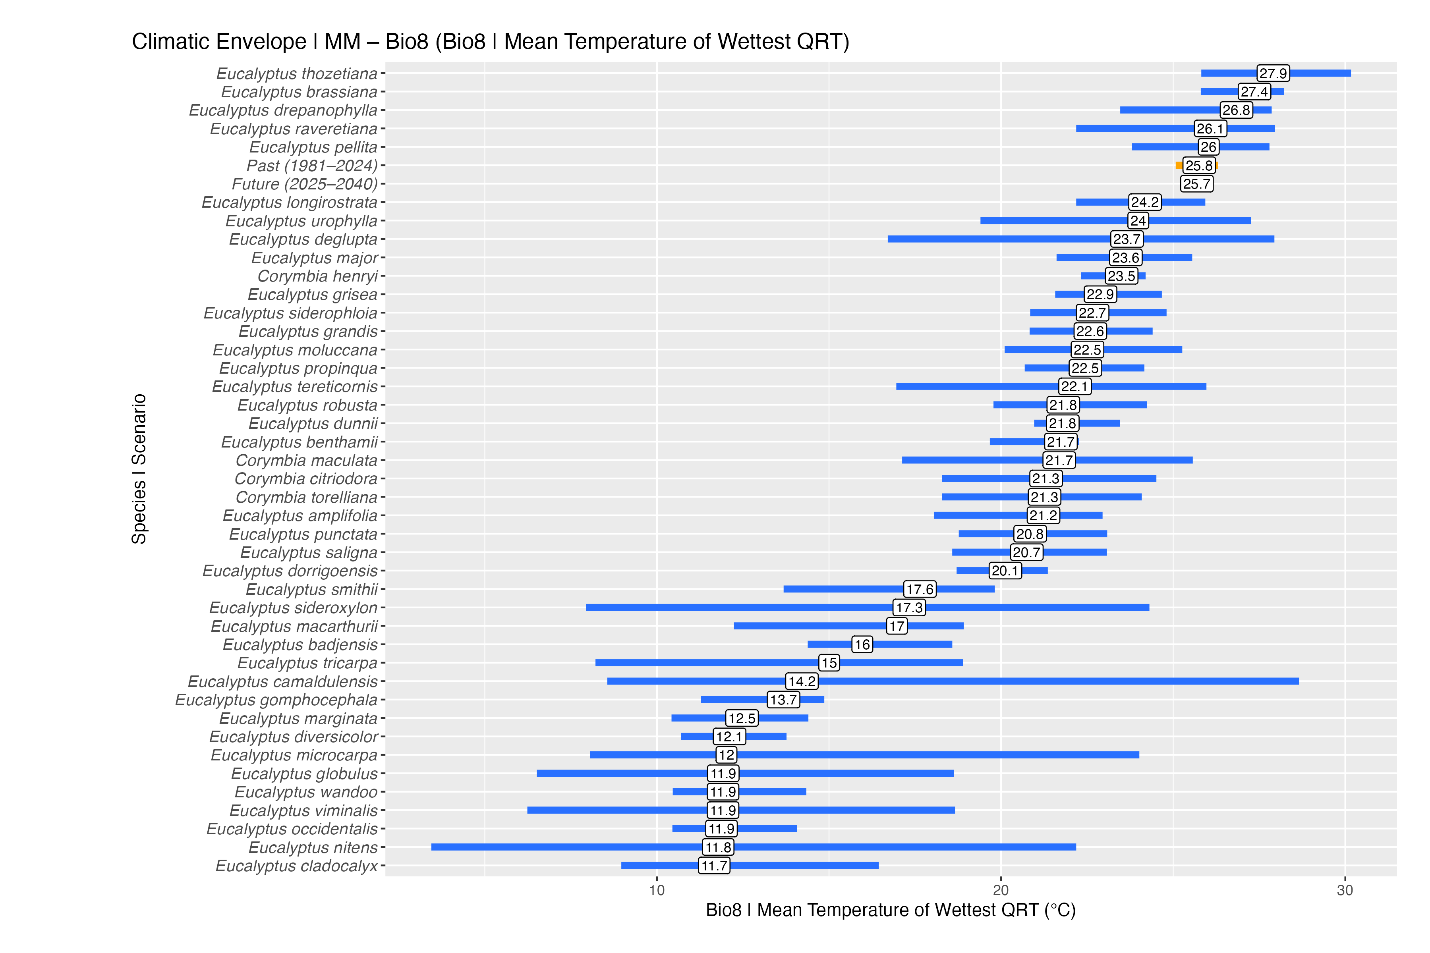

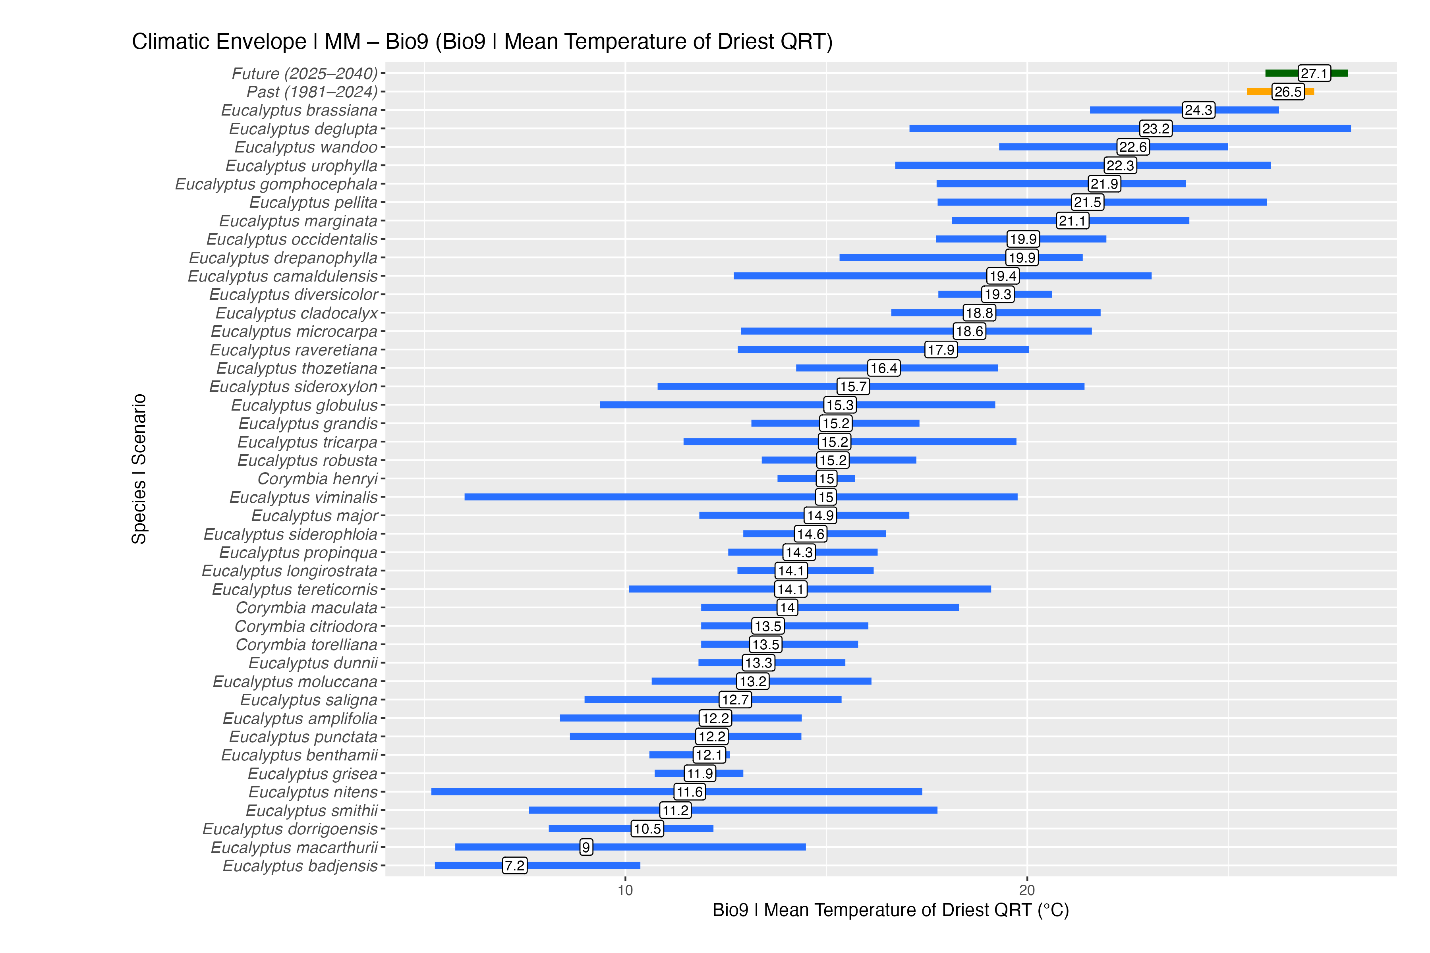

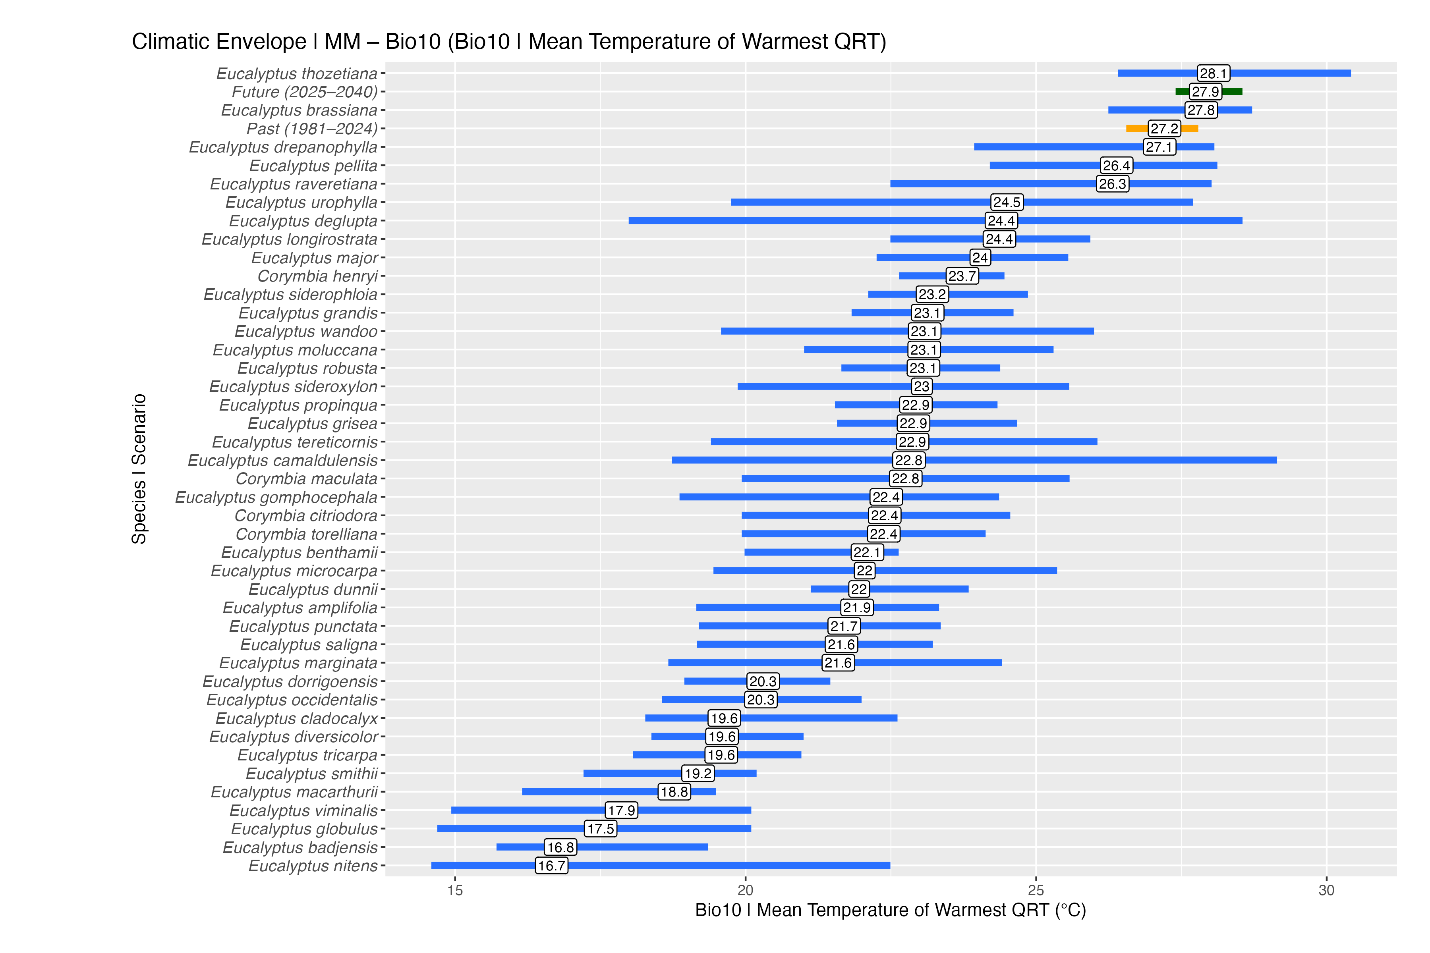

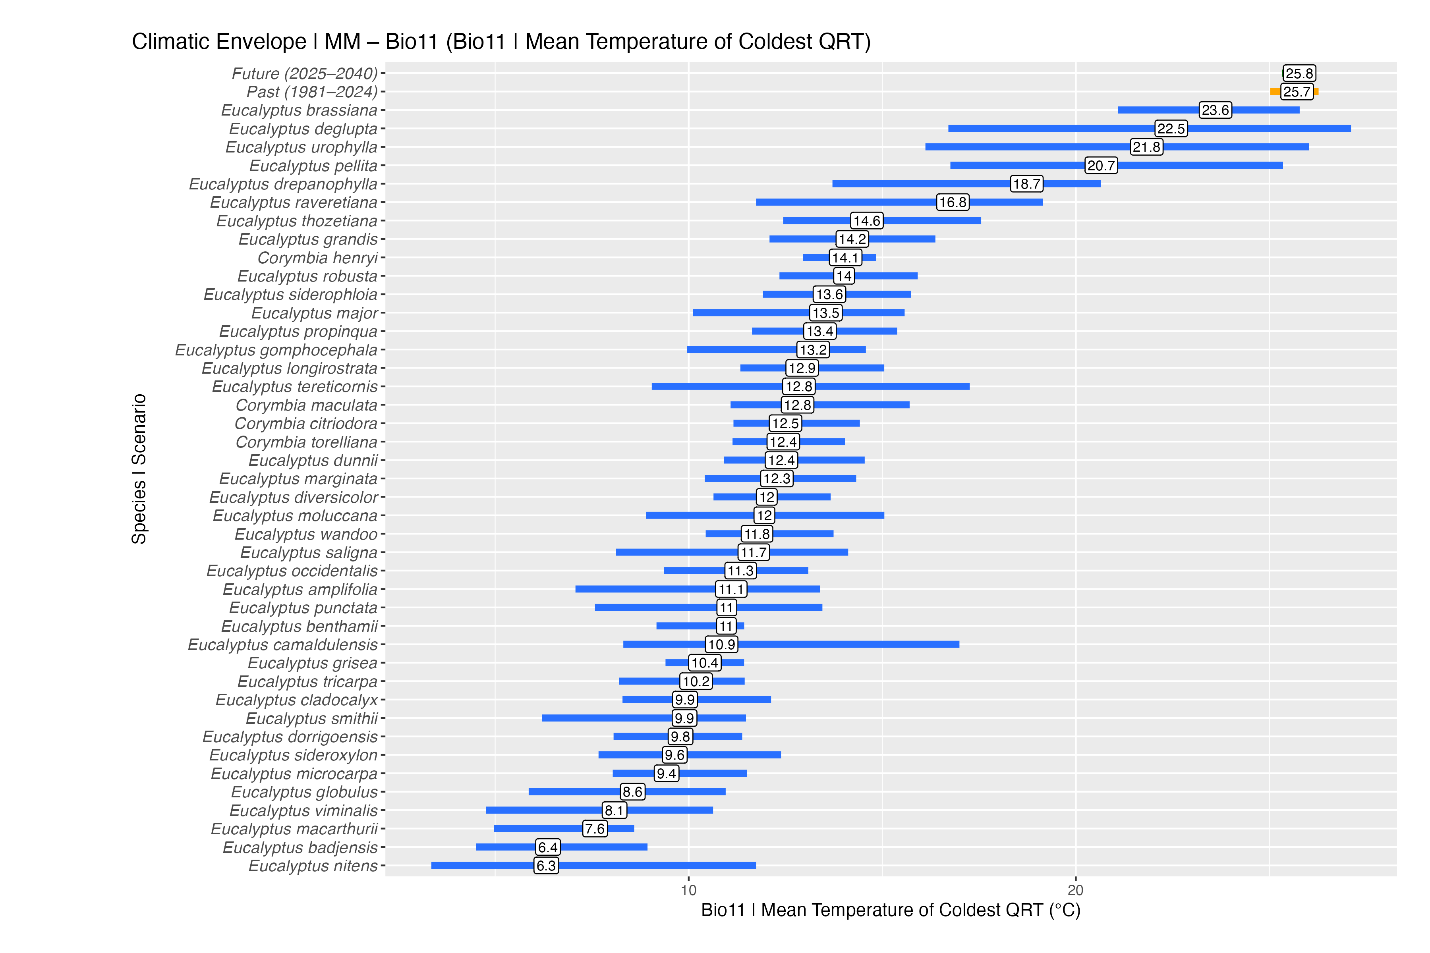

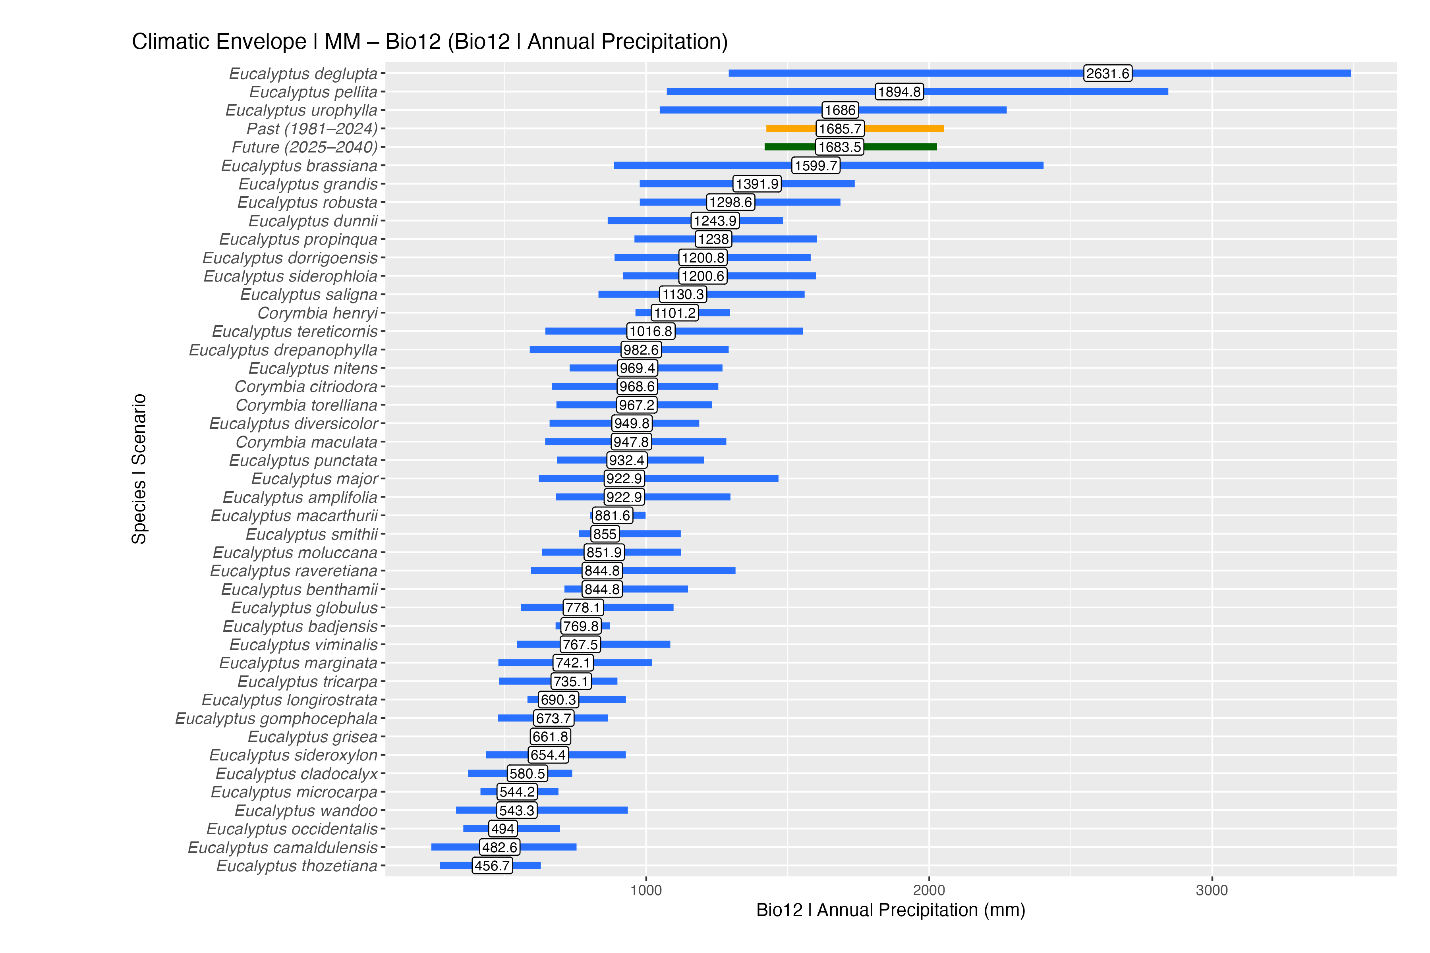

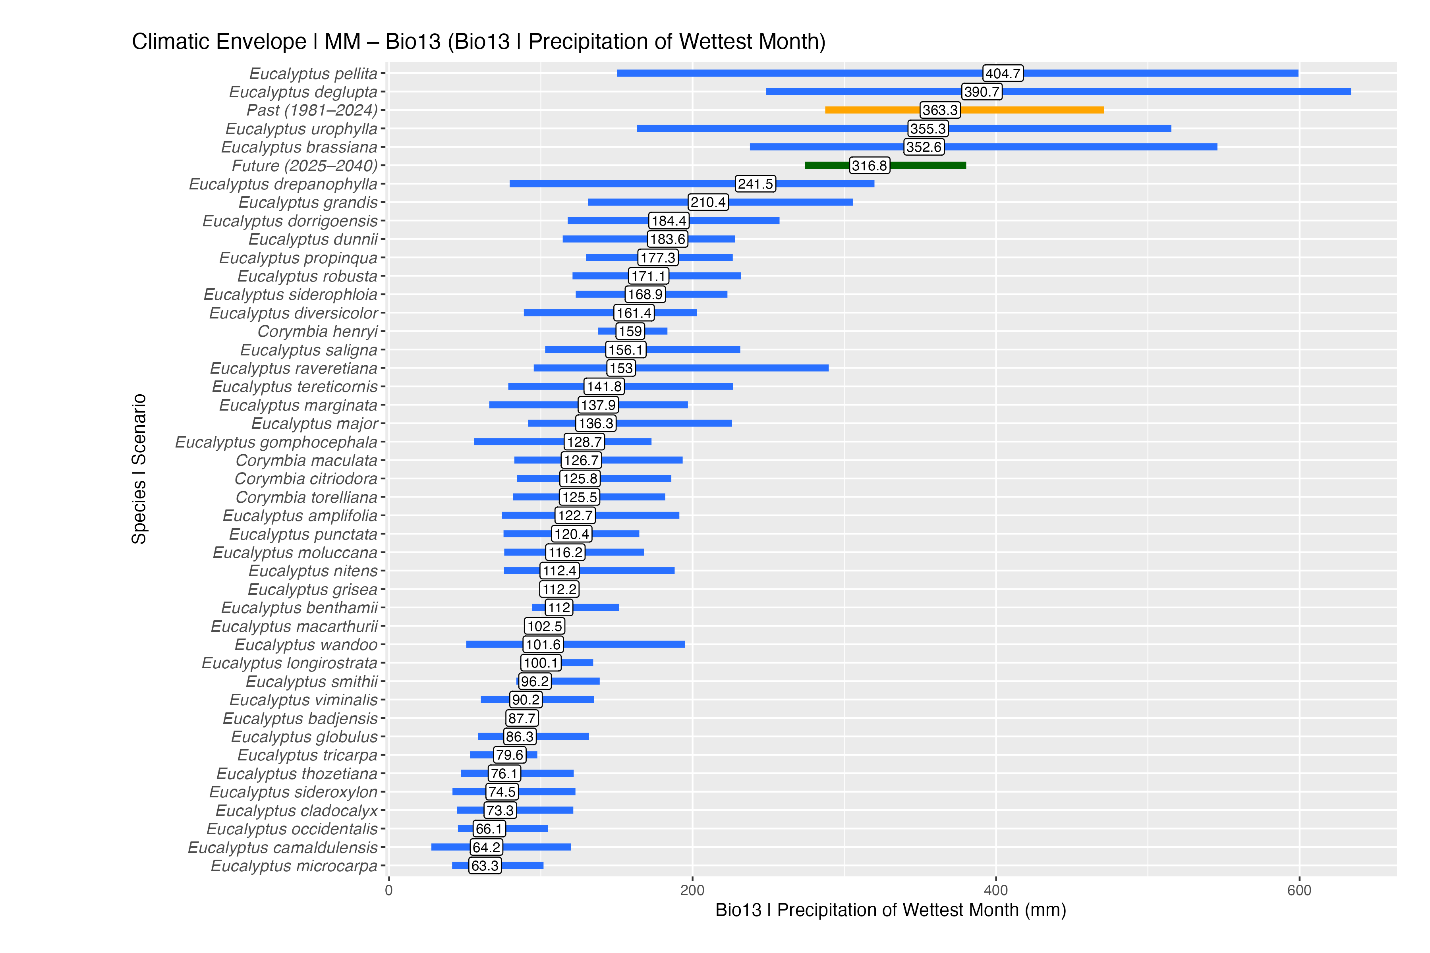

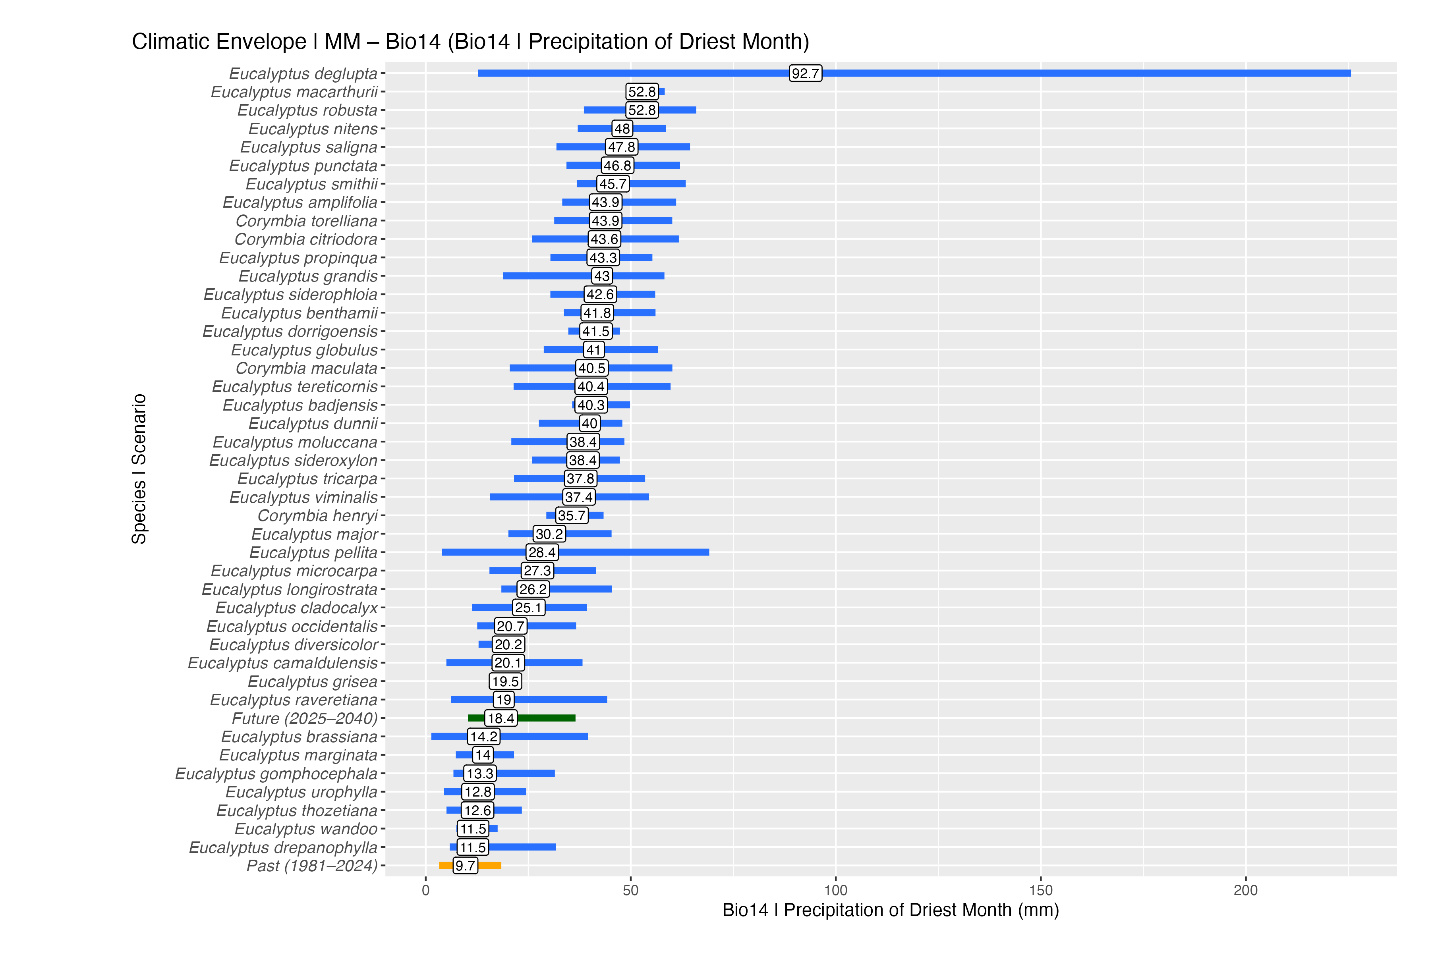

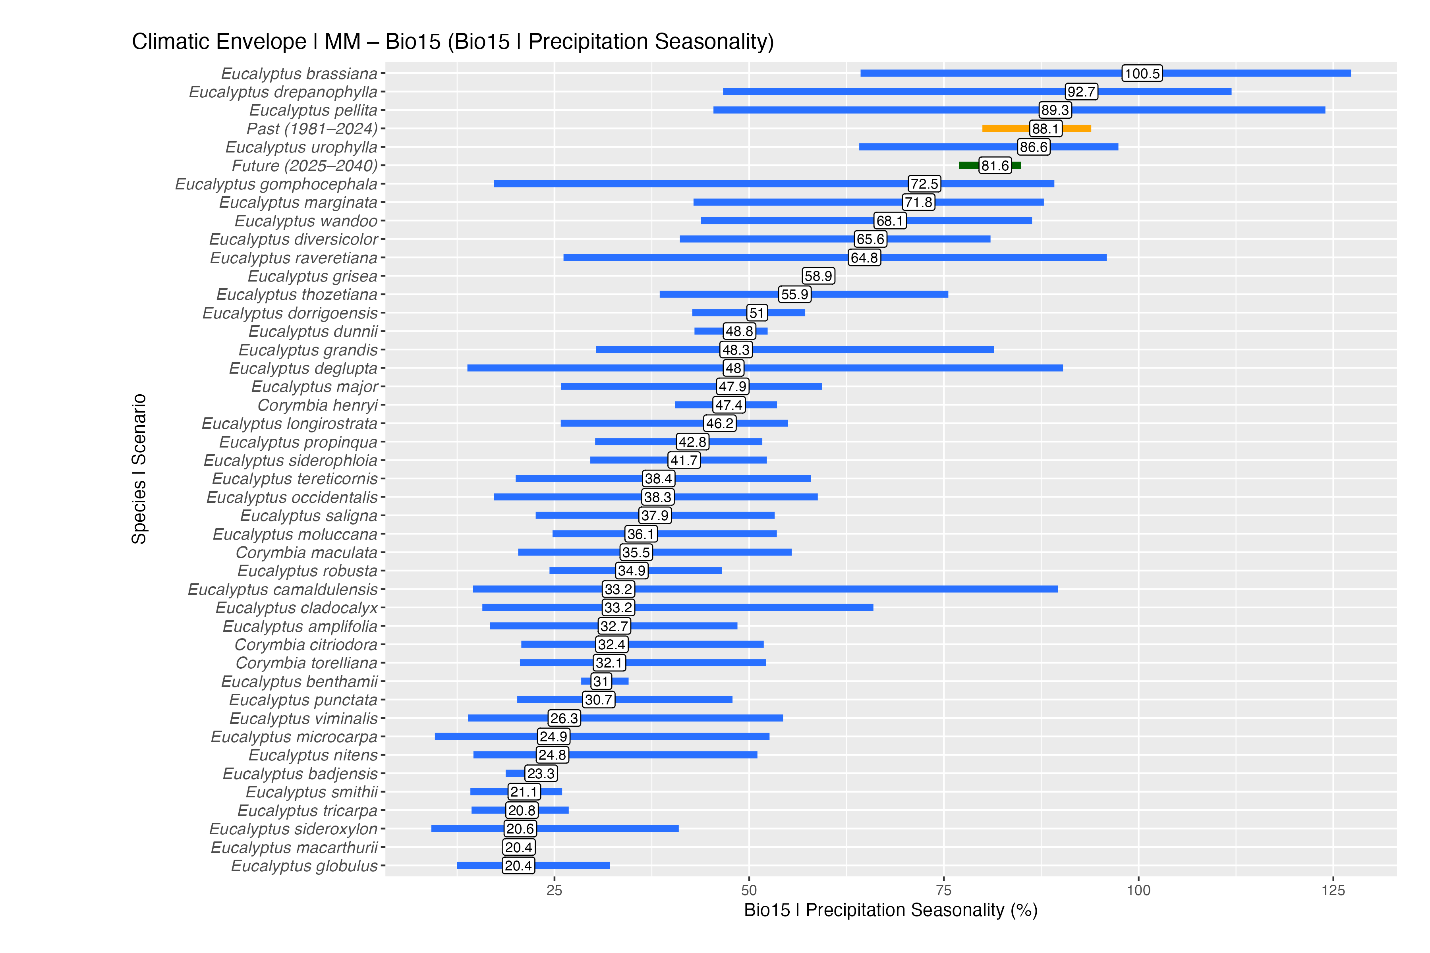

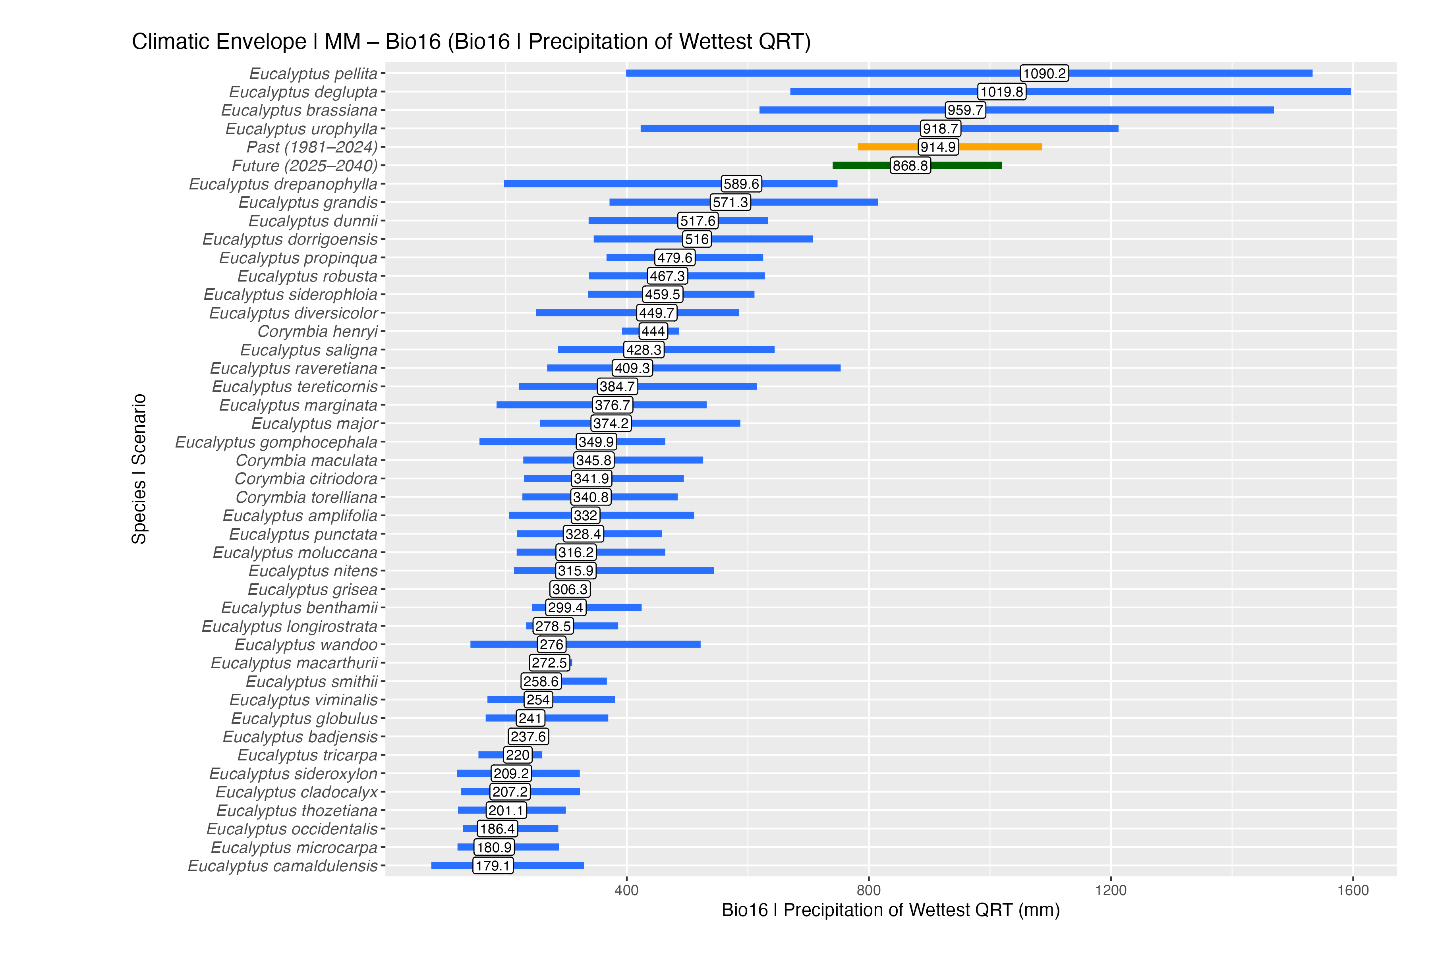

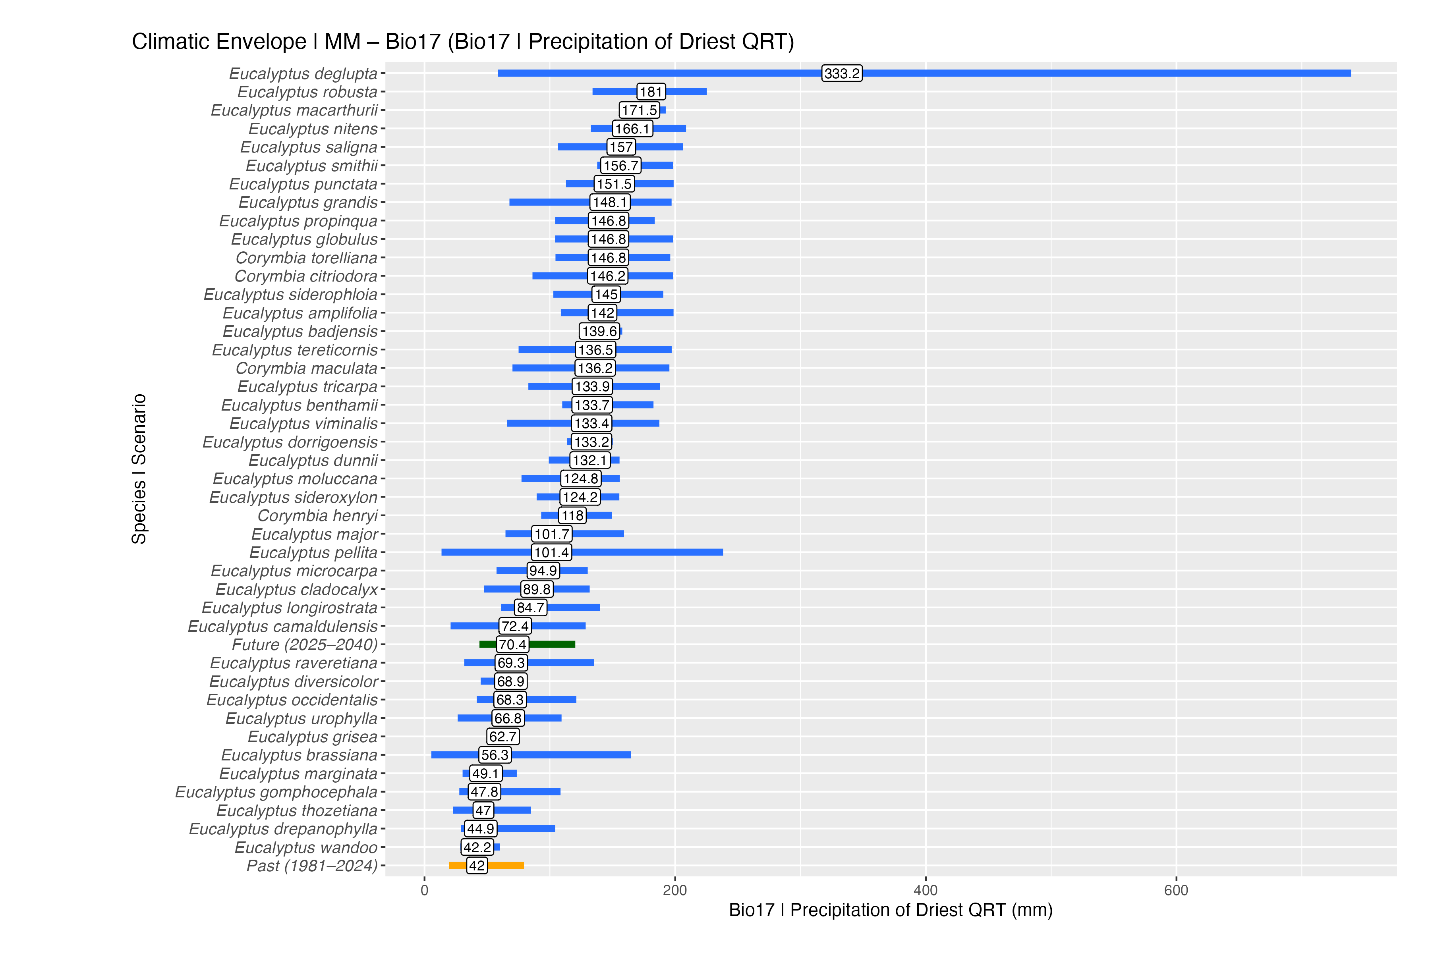

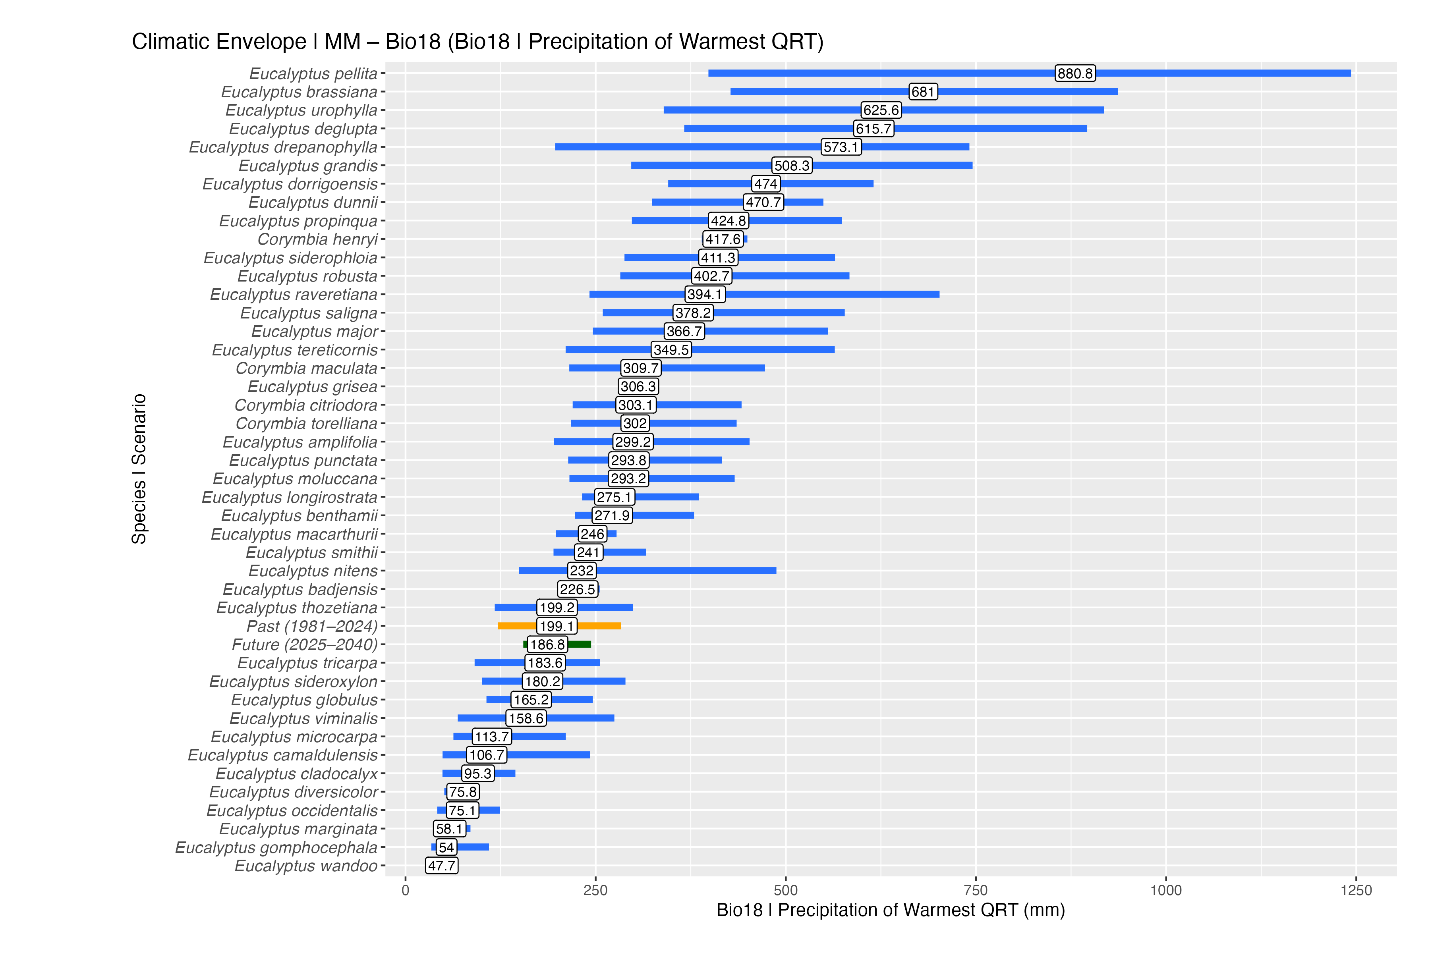

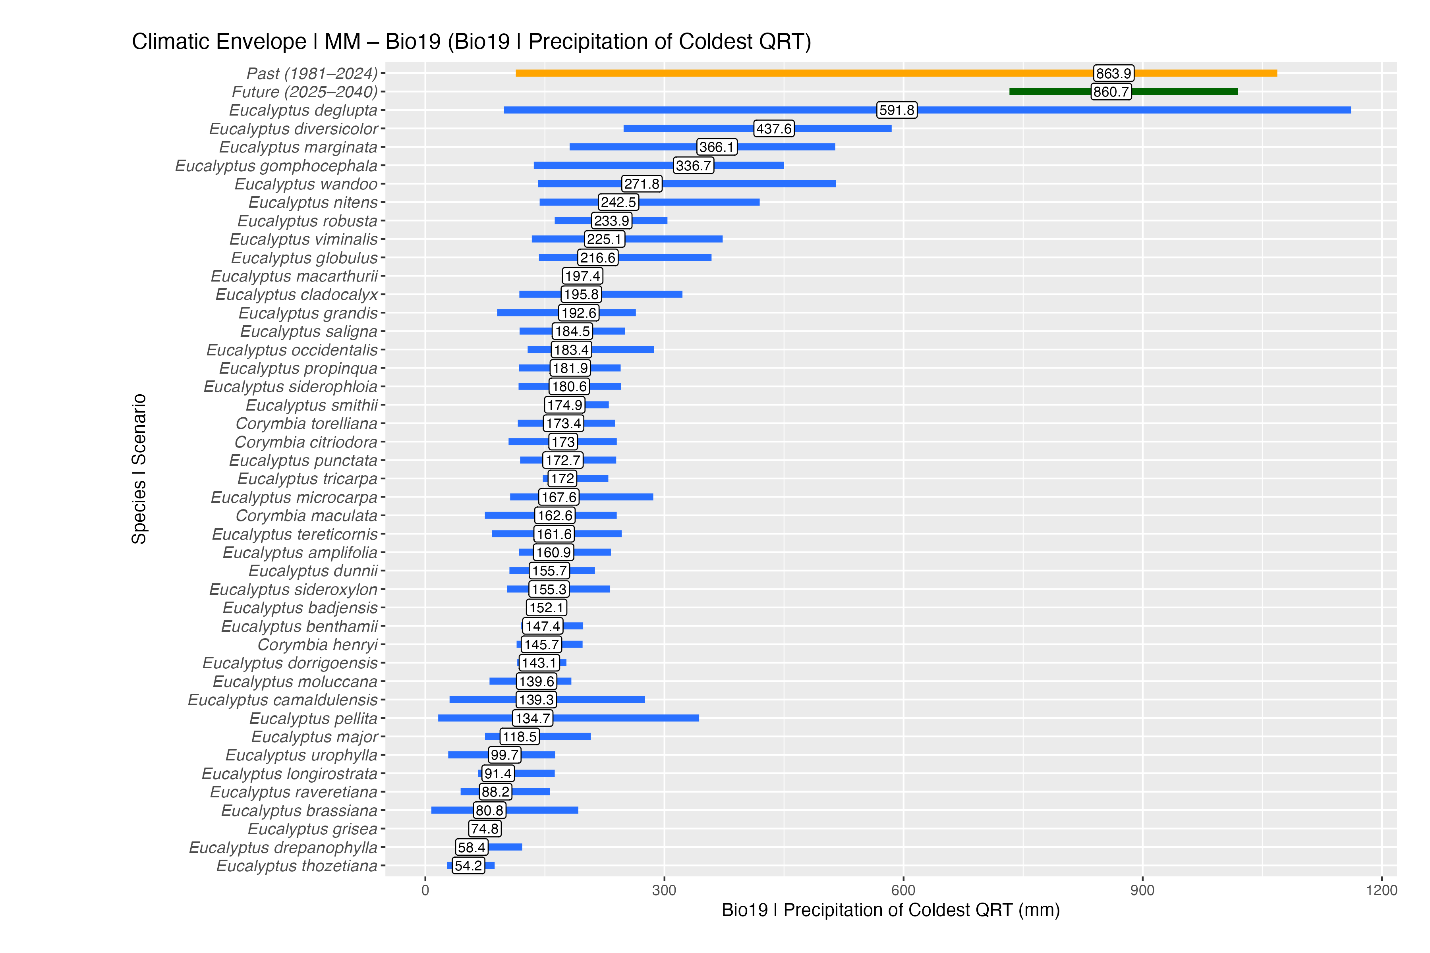

Supplement: Supplementary file 1 [file 0e158d8bb970d7192c17b74f.docx]
